# Supplementary material for: Differentiation between maxillary and malar midface position within the facial profile
Source: PeerJ. 2019 Dec 10;7:e8200. doi: 10.7717/peerj.8200 (PMC6910109; doi:10.7717/peerj.8200)
Supplement: Supplemental Information 1 [file peerj-07-8200-s001.xlsx]

## Sheet: Data of 183 patients
ID	malocclusion	Age	Growth	Sex	SexNum	SNA	SNB	ANB	AoBo	PP/MP	PP/H	SN/PP	MP/H	SN/MP	maxillary depth	Divergence	S-N	S-J	S-J /SN	S-J /SN* 100	N-J	N-J/SN	N-J /SN* 100	S-G	S-G /SN	S-G /SN* 100	N-G	N-G/SN	N-G /SN* 100
228	1	21.632	1	M	0	87.5	85.1	2.4	1.8	-3	0.3	7.6	-3.4	4.6	98	1	71.5	68.8	0.962238	96.2238	2	0.027972	2.7972	39.9	0.558042	55.8042	31	0.433566	43.3566
231	3	28.373	1	M	0	84.5	85.2	-0.7	2.1	10.6	-1.4	1.7	11.9	12.3	92.5	1	74.5	65.2	0.875168	87.5168	9.3	0.124832	12.4832	38.3	0.514094	51.4094	36.2	0.485906	48.5906
327	2	25.014	1	M	0	92.8	87.7	5.1	0.3	13.1	1.7	3.8	11.4	16.8	96	1	71.6	69.8	0.97486	97.486	1.5	0.0209497	2.09497	40.5	0.565642	56.5642	30.8	0.430168	43.0168
229	2	23.048	1	M	0	83.8	79.4	4.4	4.9	5.1	-5.5	12.3	10.5	17.3	94.2	1	72.4	64.5	0.890884	89.0884	7.5	0.103591	10.3591	37.5	0.517956	51.7956	34.4	0.475138	47.5138
046	2	25.583	1	M	0	83.6	78.3	5.3	4.9	9.1	2.8	8.6	6.2	17.6	90.3	1	71.3	66.9	0.938289	93.8289	3	0.0420757	4.20757	38.7	0.542777	54.2777	31.2	0.437588	43.7588
352	3	25.345	1	M	0	81.8	95	-13.2	-19	11	0.8	7.4	10.1	18.4	85.6	1	74.7	64.7	0.866131	86.6131	9.2	0.123159	12.3159	38	0.508701	50.8701	35.9	0.480589	48.0589
349	3	21.835	1	M	0	82.4	88.5	-6.1	-7.9	13	-5.3	5.6	18.3	18.6	88	1	70	55.9	0.798571	79.8571	14.1	0.201429	20.1429	30.8	0.44	44	39.2	0.56	56
233	2	20.25	1	M	0	84.3	79.1	5.2	6.1	11.1	5.4	8.2	5.7	19.3	93.1	1	77.6	72.8	0.938144	93.8144	2.6	0.0335052	3.35052	42.6	0.548969	54.8969	32.8	0.42268	42.268
166	1	21	1	F	1	90.3	87.7	2.6	-2.1	13.1	-3.6	6.5	16.7	19.5	95	1	66	61.1	0.925758	92.5758	4.8	0.0727273	7.27273	37.2	0.563636	56.3636	28.7	0.434848	43.4848
307	1	35.752	1	M	0	89.8	87.9	1.9	-5.1	15.4	-0.2	4.6	15.6	20	90.9	1	66	61.5	0.931818	93.1818	4.3	0.0651515	6.51515	36.4	0.551515	55.1515	29.4	0.445455	44.5455
253	3	16.926	1	F	1	82.9	84.3	-1.4	-5.9	9.8	-3	10.3	12.8	20.1	91.4	1	71.8	66.1	0.920613	92.0613	5	0.0696379	6.96379	41	0.571031	57.1031	30.1	0.41922	41.922
373	3	26.18	1	M	0	87.5	87.8	-0.3	-2.6	14.8	-1	5.4	15.8	20.1	89.4	1	69.7	64.9	0.931133	93.1133	4.6	0.0659971	6.59971	37.1	0.532281	53.2281	32.3	0.463415	46.3415
101	2	19.814	1	M	0	87.5	81.2	6.2	6.8	11.8	3.8	8.5	7.9	20.2	99.1	1	68.4	67	0.979532	97.9532	-0.1	-0.00146199	-0.146199	37.5	0.548246	54.8246	29.3	0.428363	42.8363
120	2	20.499	1	F	1	86.8	80.8	5.9	-0.6	12	-1.9	8.4	13.8	20.4	93.3	1	70	66.5	0.95	95	3.1	0.0442857	4.42857	38.1	0.544286	54.4286	31.4	0.448571	44.8571
344	3	27.543	1	M	0	85.5	86.3	-0.8	-2.3	12	-7.3	8.5	19.3	20.6	90	1	67.3	59	0.876672	87.6672	8.3	0.123328	12.3328	32.6	0.484398	48.4398	34.7	0.515602	51.5602
358	3	50.931	1	F	1	87.1	90.1	-3	-8.7	16.8	6.3	4.1	10.5	20.8	91.5	1	69.4	67.1	0.966859	96.6859	1.2	0.0172911	1.72911	38.3	0.551873	55.1873	30	0.432277	43.2277
249	3	25.386	1	M	0	82.7	83.3	-0.5	-8.3	16.4	3.7	4.8	12.7	21.2	91.7	1	75	65.5	0.873333	87.3333	8.7	0.116	11.6	42.2	0.562667	56.2667	32	0.426667	42.6667
351	3	25.005	1	M	0	84.9	90.4	-5.6	-6.3	15.9	-0.6	5.4	16.5	21.3	89.5	1	74.1	68.5	0.924426	92.4426	5.3	0.071525	7.1525	40.5	0.546559	54.6559	33.3	0.449393	44.9393
376	3	22.848	1	M	0	77.5	84	-6.5	-17	15.2	6.6	6.2	8.6	21.4	89.5	1	73.6	66.7	0.90625	90.625	5.2	0.0706522	7.06522	37.6	0.51087	51.087	34.2	0.464674	46.4674
020	1	20.113	1	F	1	80.9	79.6	1.3	-2.2	10.2	-0.3	11.4	10.6	21.7	90.1	1	62.9	57.6	0.915739	91.5739	4.1	0.0651828	6.51828	34.4	0.5469	54.69	27.3	0.434022	43.4022
012	1	30.519	1	M	0	81.5	78.1	3.4	3.1	11.6	-3.5	10.1	15.1	21.7	85.9	1	75.3	64.6	0.857902	85.7902	10.2	0.135458	13.5458	37.4	0.49668	49.668	37.4	0.49668	49.668
179	1	16.463	1	F	1	84.5	82.9	1.7	-2.2	15	1.1	7.1	13.9	22.1	94.5	1	64.8	60	0.925926	92.5926	4.2	0.0648148	6.48148	35.5	0.54784	54.784	28.6	0.441358	44.1358
067	1	22.585	1	M	0	80.2	77.2	3	3.4	14.3	-1.5	7.8	15.8	22.1	90.1	1	74.1	62.7	0.846154	84.6154	11	0.148448	14.8448	35.3	0.476383	47.6383	38.4	0.518219	51.8219
147	2	24.148	1	M	0	90.1	85.1	5	0.7	14	1.1	8.1	12.9	22.1	100.3	1	76.5	75.7	0.989542	98.9542	-0.1	-0.00130719	-0.130719	44.5	0.581699	58.1699	31.1	0.406536	40.6536
234	1	28.217	1	M	0	79.8	78.7	1.1	1.3	13.5	0.9	9	12.5	22.4	88.2	1	72.8	63.1	0.866758	86.6758	8.7	0.119505	11.9505	36.6	0.502747	50.2747	35.1	0.482143	48.2143
062	3	20.395	1	M	0	84.5	90.9	-6.4	-11.8	16	-1.1	6.7	17.1	22.7	90.4	1	65.8	58.7	0.892097	89.2097	6.7	0.101824	10.1824	33.3	0.506079	50.6079	32.1	0.487842	48.7842
318	2	16.189	1	F	1	83.5	79.4	4.1	-1.4	13.2	-1.8	10.2	15	23.4	92.2	1	67.8	61	0.899705	89.9705	6.1	0.0899705	8.99705	34.2	0.504425	50.4425	32.8	0.483776	48.3776
354	3	21.216	1	M	0	82.2	84.4	-2.2	-6.6	15.6	-7.2	8.1	22.7	23.7	89.8	1	69.4	58.2	0.838617	83.8617	11.2	0.161383	16.1383	32.9	0.474063	47.4063	36.5	0.525937	52.5937
360	3	37.572	1	F	1	82.4	86.6	-4.2	-11.4	16.1	1.8	7.7	14.3	23.7	89.8	1	65	59.2	0.910769	91.0769	4.9	0.0753846	7.53846	37	0.569231	56.9231	27.1	0.416923	41.6923
029	2	19.001	1	M	0	92.2	81.8	10.4	7.1	21.8	1.8	2	20	23.8	96.4	1	71.1	66.5	0.935302	93.5302	4.5	0.0632911	6.32911	37.9	0.533052	53.3052	33	0.464135	46.4135
366	3	17.235	1	F	1	84.1	85	-0.9	-7.9	17.4	1	6.5	16.4	23.9	90.8	1	65.2	59.3	0.909509	90.9509	5.4	0.0828221	8.28221	34.9	0.535276	53.5276	29.7	0.455521	45.5521
256	2	17.161	1	F	1	91.2	87	4.2	-2.4	14.7	-6.8	9.5	21.6	24.3	95.9	1	63.3	60.3	0.952607	95.2607	2.9	0.0458136	4.58136	33.2	0.524487	52.4487	30	0.473934	47.3934
009	2	19.056	1	F	1	87.5	80.9	6.6	0.9	15.4	7.8	8.9	7.7	24.3	98.3	1	64	63.1	0.985938	98.5938	-1.9	-0.0296875	-2.96875	36.9	0.576562	57.6562	24.4	0.38125	38.125
047	2	45.983	1	F	1	83	75.3	7.7	3.4	14.8	10.9	9.6	3.9	24.3	93.1	1	65	65.8	1.01231	101.231	-5	-0.0769231	-7.69231	38.5	0.592308	59.2308	22.4	0.344615	34.4615
289	1	18.41	1	M	0	83	82.3	0.7	-0.4	15.5	-8.1	9	23.5	24.5	90.3	1	73.3	60	0.818554	81.8554	13.3	0.181446	18.1446	34.7	0.473397	47.3397	38.6	0.526603	52.6603
039	2	21.632	1	F	1	81.1	76.1	5	3.8	14.4	6.9	10.2	7.6	24.6	91.3	1	67.3	63.8	0.947994	94.7994	0.7	0.0104012	1.04012	39.5	0.586924	58.6924	24.9	0.369985	36.9985
281	2	18.41	1	M	0	92	86.2	5.8	0	21.5	1.4	3.2	20.1	24.7	94.5	1	74.9	72.3	0.965287	96.5287	2.5	0.0333778	3.33778	41.5	0.554072	55.4072	33.2	0.443258	44.3258
241	1	28.838	1	M	0	81.2	77.6	3.6	2	14.6	1.4	10.2	13.2	24.8	96	1	74.1	68.6	0.925776	92.5776	4	0.0539811	5.39811	40	0.539811	53.9811	32.6	0.439946	43.9946
273	2	20.679	1	M	0	87.3	81	6.3	1.9	18.6	-1.4	6.2	20	24.8	97.6	1	72.1	65.6	0.909847	90.9847	6.2	0.0859917	8.59917	38.1	0.528433	52.8433	33.7	0.467406	46.7406
362	1	20.543	1	F	1	88.2	87	1.2	-2.7	15.9	-2.2	9.1	18.2	25	95.8	1	64.2	62.4	0.971963	97.1963	1.3	0.0202492	2.02492	36.8	0.573209	57.3209	26.9	0.419003	41.9003
347	3	23.489	1	M	0	83.5	84.5	-1	-6.6	11.9	-10.5	13.1	22.4	25	94.4	1	70.1	59.9	0.854494	85.4494	10.2	0.145506	14.5506	36.9	0.526391	52.6391	33.1	0.472183	47.2183
215	1	19.877	1	F	1	80.1	80	0	-6.7	11.5	-7	13.7	18.5	25.2	87.8	1	69.4	59.5	0.857349	85.7349	9.4	0.135447	13.5447	34.1	0.491354	49.1354	34.8	0.501441	50.1441
092	2	22.292	1	F	1	82.5	75	7.5	9.4	12	3.9	13.2	8.1	25.2	93.8	1	70	68.8	0.982857	98.2857	-1.9	-0.0271429	-2.71429	40.4	0.577143	57.7143	26.5	0.378571	37.8571
058	3	31.07	1	F	1	76.2	79.6	-3.4	-7.4	17.7	6.9	7.7	10.8	25.4	88.1	1	61.9	54.8	0.885299	88.5299	5.2	0.0840065	8.40065	33.5	0.541195	54.1195	26.4	0.426494	42.6494
093	1	28.666	1	F	1	79.8	77.5	2.2	-0.3	18.7	4.7	6.9	14.1	25.6	87.4	1	70.2	62.6	0.891738	89.1738	6.2	0.0883191	8.83191	39.1	0.55698	55.698	29.6	0.421652	42.1652
078	3	16.857	1	F	1	84.5	87.7	-3.2	-11.3	18.2	-5.8	7.6	23.9	25.7	95.4	1	67.1	56.5	0.842027	84.2027	10.6	0.157973	15.7973	33	0.491803	49.1803	34.1	0.508197	50.8197
170	3	18.234	1	F	1	75.9	77.7	-1.8	-6.3	14.6	-1	11	15.7	25.7	87.5	1	67.2	56.9	0.846726	84.6726	9.3	0.138393	13.8393	33.5	0.498512	49.8512	32.7	0.486607	48.6607
356	3	23.061	1	M	0	79.4	83.4	-4	-7.6	17.1	-3.9	8.6	21	25.7	84.5	1	69.9	58.3	0.834049	83.4049	11.4	0.16309	16.309	33.2	0.474964	47.4964	36.5	0.522175	52.2175
119	2	22.708	1	F	1	87.1	79.6	7.5	3.4	24	4	1.8	20	25.8	95.2	1	69.9	63.7	0.911302	91.1302	5.9	0.0844063	8.44063	38.5	0.550787	55.0787	31	0.443491	44.3491
282	2	19.932	1	F	1	87.2	80.7	6.5	3.3	20.2	0.2	5.8	20	26.1	88.3	1	66.5	62.3	0.936842	93.6842	3.9	0.0586466	5.86466	34.1	0.512782	51.2782	32	0.481203	48.1203
265	2	21.32	1	F	1	86.8	81.8	5	-2.5	18.5	0.7	7.7	17.8	26.2	93.8	1	60.9	57.5	0.944171	94.4171	2.6	0.0426929	4.26929	33.6	0.551724	55.1724	26.6	0.436782	43.6782
280	1	23.124	1	F	1	85.8	81.9	3.9	0	21.8	4.8	4.7	17	26.4	91.9	1	64.7	60	0.927357	92.7357	3.8	0.0587326	5.87326	34.2	0.528594	52.8594	29.6	0.457496	45.7496
248	1	33.079	1	M	0	79.8	76.8	3	-0.6	24.9	9.6	1.4	15.3	26.4	91.5	1	68.7	60.9	0.886463	88.6463	6.5	0.0946143	9.46143	36.6	0.532751	53.2751	30.8	0.448326	44.8326
036	1	35.056	1	M	0	75.9	73.2	2.7	7.7	19.3	0.9	7.1	18.3	26.4	87.5	1	76.4	64.8	0.848168	84.8168	10.8	0.141361	14.1361	37.7	0.493455	49.3455	37.9	0.496073	49.6073
314	2	16.586	1	F	1	82.9	78.5	4.5	-1.1	19	3.1	7.5	15.9	26.5	89.4	1	64.8	60	0.925926	92.5926	3.6	0.0555556	5.55556	35.7	0.550926	55.0926	28	0.432099	43.2099
174	1	19.275	1	F	1	86	82.7	3.3	-1.7	21.7	-3.2	4.9	24.9	26.6	94.9	1	63.8	56.1	0.87931	87.931	7.7	0.12069	12.069	31.1	0.487461	48.7461	32.8	0.514107	51.4107
232	2	23.341	1	M	0	84.9	79.3	5.6	0.2	20.1	7.9	6.5	12.2	26.6	89.2	1	70.2	68.5	0.975783	97.5783	-0.5	-0.00712251	-0.712251	41.7	0.594017	59.4017	26.3	0.374644	37.4644
236	2	23.853	1	F	1	86.3	80.9	5.4	1.1	17.4	4.1	9.2	13.3	26.6	86	1	66.1	65.5	0.990923	99.0923	-1.1	-0.0166415	-1.66415	39.4	0.596067	59.6067	24.9	0.376702	37.6702
024	2	23.62	1	M	0	83	78.1	5	1	19.9	-0.2	6.9	20.1	26.8	90.3	1	68.4	60.1	0.878655	87.8655	7.9	0.115497	11.5497	33.6	0.491228	49.1228	34.3	0.501462	50.1462
247	1	19.302	1	M	0	74.2	71.4	2.8	5.1	19.5	7	7.4	12.5	26.9	87.8	1	74.8	64.1	0.856952	85.6952	8.3	0.110963	11.0963	36.4	0.486631	48.6631	36	0.481283	48.1283
364	3	19.497	1	M	0	74.4	78.1	-3.8	-1.2	18.3	-6.3	9	24.5	27.2	83.3	2	73.9	56.3	0.76184	76.184	17.5	0.236806	23.6806	36.9	0.499323	49.9323	36.9	0.499323	49.9323
010	3	21.632	1	M	0	80.6	82.8	-2.2	-6.9	22.9	2.4	4.3	20.4	27.2	88.8	2	72.1	62.3	0.864078	86.4078	9.3	0.128988	12.8988	33.8	0.468793	46.8793	37.8	0.524272	52.4272
223	1	26.925	1	M	0	82.7	78.9	3.8	-1.2	19.4	5.3	7.8	14.2	27.3	92.9	2	70.1	65.2	0.9301	93.01	3.1	0.0442225	4.42225	38.7	0.552068	55.2068	29.6	0.422254	42.2254
267	2	18.07	1	M	0	82.8	76.3	6.5	3.9	17.6	-1.2	9.7	18.8	27.3	94.6	2	73.1	65.7	0.898769	89.8769	6.7	0.0916553	9.16553	37.1	0.507524	50.7524	35.2	0.481532	48.1532
102	2	30.853	1	M	0	84.1	79	5	-0.2	23.6	6.1	3.7	17.5	27.3	91.5	2	69.8	63.8	0.91404	91.404	5	0.0716332	7.16332	36.9	0.528653	52.8653	31.8	0.455587	45.5587
132	2	22.522	1	F	1	78.9	74	4.9	5.9	19.9	7.3	7.5	12.6	27.4	90.3	2	70	60.4	0.862857	86.2857	7.3	0.104286	10.4286	35.6	0.508571	50.8571	32	0.457143	45.7143
225	2	30.01	1	F	1	82.4	78	4.4	2.9	13.5	-2.2	14	15.7	27.4	96.4	2	68.2	63.3	0.928152	92.8152	3.5	0.0513196	5.13196	35.8	0.524927	52.4927	31	0.454545	45.4545
172	2	20.239	1	F	1	89.4	82.8	6.6	-3.6	19.1	-0.6	8.4	19.8	27.5	94	2	68.3	66	0.966325	96.6325	1.6	0.0234261	2.34261	39	0.57101	57.101	28.7	0.420205	42.0205
329	2	23.321	1	F	1	87.3	80.7	6.7	2.2	18.1	5.6	9.7	12.5	27.8	92.6	2	62.8	64.4	1.02548	102.548	-3.8	-0.0605096	-6.05096	37.9	0.603503	60.3503	22.8	0.363057	36.3057
297	1	17.561	1	F	1	84.5	84.3	0.1	-5.8	19.9	9.5	8	10.4	27.9	92.6	2	68.2	66	0.967742	96.7742	-1	-0.0146628	-1.46628	38.5	0.564516	56.4516	26.5	0.388563	38.8563
027	2	28.882	1	M	0	86.4	80.3	6.1	5.8	20.8	0.6	7.3	20.2	28.1	90.1	2	63.3	59.1	0.933649	93.3649	3.5	0.0552923	5.52923	34.4	0.543444	54.3444	28.3	0.447077	44.7077
355	3	31.404	1	F	1	85.3	85.6	-0.2	-6.1	18.2	-1	10	19.2	28.1	95.7	2	60.1	56.5	0.9401	94.01	2.9	0.0482529	4.82529	33.8	0.562396	56.2396	25.5	0.424293	42.4293
069	3	48.754	1	M	0	80	84.6	-4.7	-15.2	17.9	-4	10.2	21.9	28.1	90.2	2	70.2	60.7	0.864672	86.4672	9.1	0.12963	12.963	35.4	0.504274	50.4274	34.4	0.490028	49.0028
049	2	31.664	1	F	1	85.4	77.6	7.8	6.2	16.1	-3.5	12.2	19.6	28.3	91.3	2	64.1	60.1	0.937598	93.7598	3.3	0.0514821	5.14821	33.4	0.521061	52.1061	30	0.468019	46.8019
254	2	23.113	1	M	0	84.5	77.8	6.8	3.2	19	0.2	9.4	18.8	28.4	93.1	2	69.5	64.4	0.926619	92.6619	4.2	0.0604317	6.04317	36.6	0.526619	52.6619	31.9	0.458993	45.8993
144	3	43.39	1	M	0	83.4	83.9	-0.4	-4.2	21.1	3	7.4	18.1	28.5	96.4	2	76.7	72.8	0.949153	94.9153	2.6	0.0338983	3.38983	42.3	0.551499	55.1499	33.1	0.431551	43.1551
270	2	19.976	1	F	1	85.9	79.7	6.2	2.2	20.6	3.1	8.2	17.5	28.8	94.5	2	67.7	64.2	0.948301	94.8301	2.2	0.0324963	3.24963	36.5	0.539143	53.9143	29.9	0.441654	44.1654
206	2	26.407	1	F	1	86.5	79.7	6.8	3.8	20.8	0.6	8.1	20.2	28.9	93.9	2	69	65.4	0.947826	94.7826	2.8	0.0405797	4.05797	37.6	0.544928	54.4928	30.6	0.443478	44.3478
173	1	21.145	1	F	1	79.8	77.9	1.9	-5.5	19.5	5.7	9.5	13.9	29	92.9	2	65.4	60.4	0.923547	92.3547	2.7	0.0412844	4.12844	35.1	0.536697	53.6697	28.1	0.429664	42.9664
068	2	35.804	1	F	1	83.7	77.5	6.2	5.8	20.3	5.4	8.7	15	29.1	96.7	2	65.8	63.6	0.966565	96.6565	0.1	0.00151976	0.151976	35.1	0.533435	53.3435	28.7	0.43617	43.617
224	1	26.128	1	M	0	84.2	81.8	2.4	-2.4	20.5	-1.4	8.7	21.8	29.2	97.6	2	67.4	62.5	0.9273	92.73	4.3	0.0637982	6.37982	35.1	0.520772	52.0772	31.7	0.470326	47.0326
118	2	26.098	1	F	1	87.7	79.1	8.6	6.3	31.3	6.6	-2.1	24.7	29.2	91.8	2	64.7	60.7	0.938176	93.8176	3.8	0.0587326	5.87326	36.9	0.570325	57.0325	27.5	0.425039	42.5039
359	3	28.808	1	F	1	77.5	79.7	-2.2	-6.9	20.1	0.2	9.1	19.9	29.2	86.1	2	66	57.1	0.865152	86.5152	8	0.121212	12.1212	35	0.530303	53.0303	30.1	0.456061	45.6061
368	3	31.59	1	F	1	73.7	77.9	-4.2	-7.4	21.1	6.2	8.1	15	29.2	84.5	2	65.3	55.9	0.856049	85.6049	7.4	0.113323	11.3323	34.8	0.532925	53.2925	28.5	0.436447	43.6447
310	2	36.756	1	F	1	83.7	78.4	5.3	-0.7	19.9	3.4	9.5	16.5	29.4	94.1	2	69	64.7	0.937681	93.7681	2.6	0.0376812	3.76812	37.3	0.54058	54.058	30	0.434783	43.4783
251	3	19.976	1	M	0	78	82.4	-4.4	-12.6	20.5	6.2	9	14.2	29.5	85.6	2	76.5	68.7	0.898039	89.8039	5.1	0.0666667	6.66667	42.5	0.555556	55.5556	31.3	0.40915	40.915
187	1	25.183	1	F	1	83	82	1.1	-6.7	17.7	-2.5	11.8	20.2	29.6	92.9	2	65.6	59.4	0.905488	90.5488	5.4	0.0823171	8.23171	34.6	0.527439	52.7439	30.2	0.460366	46.0366
348	1	18.544	1	M	0	79.6	76	3.6	-0.7	20.4	1.8	9.3	18.6	29.7	90.3	2	68.9	62.9	0.912917	91.2917	4.7	0.0682148	6.82148	37.6	0.545718	54.5718	30	0.435414	43.5414
320	3	25.786	1	M	0	78.3	80.6	-2.3	-6.7	20.6	2.3	9.1	18.3	29.7	88.3	2	64.5	57.7	0.894574	89.4574	5.5	0.0852713	8.52713	33.3	0.516279	51.6279	29.9	0.463566	46.3566
162	1	30.407	1	F	1	78.9	77.9	0.9	-3.2	11.4	-8.8	18.4	20.1	29.8	87.8	2	63.8	57	0.893417	89.3417	6	0.0940439	9.40439	31	0.485893	48.5893	31.9	0.5	50
353	3	18.44	1	M	0	78.5	85.9	-7.5	-16.5	24.6	-1.6	5.3	26.2	29.9	88.9	2	69.6	56.5	0.811782	81.1782	12.9	0.185345	18.5345	32.6	0.468391	46.8391	36.9	0.530172	53.0172
336	1	18.714	1	M	0	83.3	82.9	0.4	-6.9	21.8	0.2	8.3	21.6	30.1	90	2	72.3	68	0.940526	94.0526	3.5	0.0484094	4.84094	39.9	0.551867	55.1867	31.6	0.437068	43.7068
230	2	20	1	M	0	82.8	77.7	5.1	8.5	23.3	4.6	6.8	18.7	30.1	93.6	2	72.8	65.5	0.899725	89.9725	5.9	0.081044	8.1044	39.9	0.548077	54.8077	31.5	0.432692	43.2692
032	2	31.004	1	F	1	82.7	77.6	5.2	5	20.2	0.6	9.9	19.6	30.1	92.4	2	70.7	66	0.933522	93.3522	3.5	0.049505	4.9505	37.1	0.524752	52.4752	32.4	0.458274	45.8274
217	1	20.543	1	F	1	84.3	81.7	2.6	-1.3	18.4	1.7	11.8	16.8	30.2	93.4	2	65	62.9	0.967692	96.7692	0.3	0.00461538	0.461538	38.2	0.587692	58.7692	25	0.384615	38.4615
163	1	50.621	1	F	1	84.1	80.2	3.9	-1	18.1	-1.3	12.4	19.4	30.5	91.1	2	64.7	61.6	0.952087	95.2087	1.9	0.0293663	2.93663	36.2	0.559505	55.9505	27.3	0.421947	42.1947
103	2	21.602	1	M	0	84.2	79.9	4.3	3.2	23	5.6	7.5	17.4	30.5	91.6	2	72	65.7	0.9125	91.25	4.4	0.0611111	6.11111	37.2	0.516667	51.6667	32.9	0.456944	45.6944
210	2	24.956	1	F	1	82.1	78	4.1	2.3	21.4	4	9.2	17.4	30.6	89.8	2	64.7	59.3	0.916538	91.6538	3.8	0.0587326	5.87326	34.5	0.53323	53.323	28.5	0.440495	44.0495
374	3	20.581	1	M	0	80.5	81.5	-1	-5.8	26.4	7.9	4.3	18.5	30.7	87.6	2	75.1	69.3	0.92277	92.277	4.1	0.0545939	5.45939	41.4	0.551265	55.1265	32	0.426099	42.6099
011	3	47.333	1	M	0	86	87.2	-1.2	-4.8	26	-1.3	4.7	27.3	30.7	92.9	2	63.8	56	0.877743	87.7743	7.8	0.122257	12.2257	32.5	0.509404	50.9404	31.2	0.489028	48.9028
169	1	44.836	1	F	1	79.5	76.1	3.4	0.4	21.9	1	8.9	20.9	30.8	86.5	2	73.8	65.5	0.887534	88.7534	7.3	0.098916	9.8916	39.8	0.539295	53.9295	32.9	0.445799	44.5799
014	2	30.892	1	F	1	82.8	74.5	8.3	4.2	19.4	5.9	11.3	13.6	30.8	89.4	2	65.9	63.8	0.968134	96.8134	-0.8	-0.0121396	-1.21396	37.1	0.562974	56.2974	25.9	0.39302	39.302
026	3	16.318	1	F	1	78.4	84.2	-5.9	-6.9	28	1.7	3	26.3	31	90.3	2	63.3	51.5	0.813586	81.3586	11.6	0.183254	18.3254	30.2	0.477093	47.7093	32.9	0.519747	51.9747
250	3	22.062	1	F	1	78.4	80.8	-2.4	-12.8	19.5	-1.9	11.7	21.4	31.1	87.1	2	65.3	58.6	0.897397	89.7397	5.8	0.0888208	8.88208	35.6	0.545176	54.5176	28.8	0.441041	44.1041
298	1	25.101	1	F	1	77.2	75.7	1.5	-5	22.8	6.2	8.4	16.6	31.2	84.9	2	66.9	60	0.896861	89.6861	4.8	0.0717489	7.17489	35.4	0.529148	52.9148	29.3	0.437967	43.7967
293	3	22.829	1	F	1	85.2	87.8	-2.7	-11.6	21.6	0.7	9.6	20.9	31.2	89.7	2	68.7	64.7	0.941776	94.1776	2.9	0.0422125	4.22125	39.2	0.570597	57.0597	28.4	0.413392	41.3392
252	3	23.554	1	F	1	76.8	79.4	-2.6	-6.6	23.3	1.1	7.9	22.3	31.3	87.1	2	67.7	56.9	0.840473	84.0473	10	0.14771	14.771	32.7	0.483013	48.3013	34.2	0.50517	50.517
065	3	30.18	1	F	1	72.5	72.8	-0.3	-2.7	20.9	6.9	10.5	14	31.3	83	2	66.7	57.5	0.862069	86.2069	6.3	0.0944528	9.44528	33.4	0.50075	50.075	30.3	0.454273	45.4273
371	3	22.27	1	M	0	80.6	82.2	-1.6	-12.2	23.4	0	8.3	23.4	31.7	89.2	2	72	62.9	0.873611	87.3611	8.3	0.115278	11.5278	39	0.541667	54.1667	32.2	0.447222	44.7222
028	1	41.534	1	F	1	80.9	77	3.8	-0.8	20.3	1	11.6	19.2	31.9	91.3	2	65.2	58.4	0.895706	89.5706	5.3	0.0812883	8.12883	34.5	0.529141	52.9141	29.1	0.446319	44.6319
122	2	36.017	1	F	1	86	79.7	6.3	3.4	23.3	-0.9	8.6	24.2	31.9	91.4	2	68.3	62.1	0.909224	90.9224	5.5	0.0805271	8.05271	36	0.527086	52.7086	31.7	0.464129	46.4129
165	2	27.795	1	F	1	79	73.8	5.2	1.6	18.1	1.3	14.3	16.8	32.4	90.4	2	65.8	60.1	0.913374	91.3374	3.3	0.050152	5.0152	35.1	0.533435	53.3435	28.3	0.430091	43.0091
305	2	24.584	1	F	1	84.1	74.1	10	7.9	24.8	6.4	7.8	18.4	32.5	89.2	2	65.5	62.9	0.960305	96.0305	0.6	0.00916031	0.916031	35.1	0.535878	53.5878	28.4	0.433588	43.3588
168	2	50.205	1	F	1	85.8	81.6	4.2	-6	24	1.2	8.5	22.8	32.5	99.8	2	70.7	67.8	0.958982	95.8982	1.9	0.0268741	2.68741	40.1	0.567185	56.7185	29.6	0.41867	41.867
161	1	24.061	1	F	1	85.3	82.2	3.1	-3.8	30.2	6.7	2.4	23.6	32.6	94	2	66.4	62.8	0.945783	94.5783	2.8	0.0421687	4.21687	36.5	0.549699	54.9699	29.1	0.438253	43.8253
060	1	23.557	1	M	0	81.9	81.5	0.3	-6.8	21.7	-3	11	24.7	32.7	92.3	2	68.1	58.9	0.864905	86.4905	8.6	0.126285	12.6285	34.5	0.506608	50.6608	32.9	0.483113	48.3113
160	1	24.622	1	F	1	85.4	83.2	2.2	-5.5	25.4	1.7	7.3	23.6	32.7	92	2	62.3	59.9	0.961477	96.1477	1.6	0.0256822	2.56822	35.2	0.565008	56.5008	26.3	0.422151	42.2151
148	2	23.94	1	M	0	83	78.7	4.3	2.4	25.1	5.9	7.8	19.2	32.8	91.9	2	73.7	69.8	0.947083	94.7083	1.9	0.0257802	2.57802	41.3	0.56038	56.038	30.3	0.411126	41.1126
237	2	33.205	1	F	1	80.9	72.2	8.7	3.7	30	10.8	2.8	19.2	32.8	88.9	2	68.3	60.5	0.885798	88.5798	5.9	0.0863836	8.63836	34.8	0.509517	50.9517	31.6	0.462665	46.2665
013	3	36.165	1	M	0	77.5	80.7	-3.2	-0.3	25	-1.1	7.8	26.1	32.8	87.4	2	65.3	55	0.842266	84.2266	9.9	0.151608	15.1608	31.6	0.48392	48.392	33.3	0.509954	50.9954
097	2	17.58	1	F	1	80.5	74.6	5.9	-1.1	21.1	2.4	11.8	18.7	32.9	93.2	2	62.7	59.6	0.950558	95.0558	1.2	0.0191388	1.91388	33.2	0.529506	52.9506	27.6	0.440191	44.0191
221	3	22.35	1	M	0	80.2	82.1	-1.9	-9.9	26.9	9.8	6.1	17.2	33	91.5	2	67.3	60.4	0.897474	89.7474	4.3	0.063893	6.3893	33.1	0.491828	49.1828	31.6	0.469539	46.9539
290	1	43.971	1	M	0	84.8	83.5	1.3	-4.3	34	12	-0.9	22	33.1	95.1	2	74.3	70	0.942127	94.2127	2.9	0.039031	3.9031	38.7	0.520861	52.0861	34.2	0.460296	46.0296
145	2	35.486	1	M	0	83.1	78.7	4.4	-1.7	19.2	0.1	14	19.1	33.2	96.5	2	70.7	67.6	0.956153	95.6153	0.9	0.0127298	1.27298	39.4	0.557284	55.7284	29.1	0.411598	41.1598
261	2	26.196	1	F	1	83.2	79	4.2	-4.2	23.6	9.4	9.9	14.2	33.5	96.3	2	64.2	63.3	0.985981	98.5981	-2.7	-0.0420561	-4.20561	38.3	0.596573	59.6573	22.3	0.347352	34.7352
100	1	24.069	1	M	0	72.9	70	2.8	3.7	20	-3	13.7	22.9	33.7	84.8	2	69.7	60.2	0.863702	86.3702	8.3	0.119082	11.9082	34.2	0.490674	49.0674	34.4	0.493544	49.3544
257	1	33.583	1	F	1	76.9	74.2	2.7	4.5	21	5.5	12.9	15.5	33.8	86.9	2	70.1	66.4	0.947218	94.7218	0.1	0.00142653	0.142653	41.2	0.587732	58.7732	25.4	0.36234	36.234
315	1	44.001	1	F	1	84.1	80.4	3.7	-4.7	24.2	0.3	9.8	23.8	33.9	94.7	2	64.2	61	0.950156	95.0156	2.2	0.0342679	3.42679	35.7	0.556075	55.6075	27.5	0.428349	42.8349
045	2	29.498	1	F	1	82.1	75.1	6.9	2.9	21	1.6	13.2	19.4	34.2	91.5	2	61.8	59.4	0.961165	96.1165	0.3	0.00485437	0.485437	35.7	0.57767	57.767	24	0.38835	38.835
381	3	18.749	1	M	0	76	79.1	-3.1	-12.2	23.6	6.8	10.6	16.9	34.2	82.1	2	71.4	63.1	0.883754	88.3754	5	0.070028	7.0028	37.7	0.528011	52.8011	30.4	0.42577	42.577
167	1	24.181	1	F	1	76	73.8	2.2	-3.9	22	6.6	12.3	15.5	34.3	91.2	2	72.7	66.8	0.918845	91.8845	2	0.0275103	2.75103	39.1	0.537827	53.7827	29.7	0.408528	40.8528
106	2	21.725	1	M	0	85	79.1	5.9	-5.1	21.1	0.2	13.2	20.9	34.3	93.1	2	67.5	66.1	0.979259	97.9259	-0.4	-0.00592593	-0.592593	39.5	0.585185	58.5185	26.2	0.388148	38.8148
333	2	24.324	1	F	1	83.5	75	8.4	1	17.9	-3.1	16.4	21	34.3	92.8	2	59.2	57.5	0.971284	97.1284	0.1	0.00168919	0.168919	31.7	0.535473	53.5473	25.9	0.4375	43.75
104	1	33.709	1	M	0	76.7	73.6	3.1	3.4	22.3	1	12	21.3	34.4	84	2	69.2	61.1	0.882948	88.2948	6.3	0.0910405	9.10405	34.9	0.504335	50.4335	32.5	0.469653	46.9653
128	2	26.741	1	F	1	81.9	76.3	5.7	5.3	21.5	0.6	13.2	20.9	34.7	96.8	2	61.9	56.9	0.919225	91.9225	3.3	0.0533118	5.33118	32.4	0.523425	52.3425	27.7	0.447496	44.7496
189	1	16.756	1	F	1	79.8	78.9	0.9	-3.8	22.8	-6.6	12	29.4	34.8	91.1	2	66.2	53.9	0.814199	81.4199	12	0.181269	18.1269	30.6	0.462236	46.2236	35.3	0.533233	53.3233
343	2	20.71	1	F	1	83.7	79	4.7	-2.7	25.9	2	9.2	23.8	35	88.9	2	63.8	59.3	0.929467	92.9467	3.3	0.0517241	5.17241	33.3	0.521944	52.1944	29.3	0.459248	45.9248
146	1	30.068	1	M	0	79.2	78.8	0.4	-5.5	26	1	9.2	25	35.2	90.8	2	70.9	62.4	0.880113	88.0113	7.5	0.105783	10.5783	36.2	0.510578	51.0578	33.6	0.473907	47.3907
099	2	27.74	1	M	0	92.9	85.7	7.2	-5.6	31.9	-2	3.5	33.9	35.3	98.7	2	67.8	65.5	0.966077	96.6077	2.3	0.0339233	3.39233	40.2	0.59292	59.292	27.6	0.40708	40.708
339	2	48.505	1	M	0	75.4	70.6	4.8	6.1	17.3	-5	17.9	22.3	35.3	89.6	2	71.5	61.9	0.865734	86.5734	7.8	0.109091	10.9091	35.7	0.499301	49.9301	34	0.475524	47.5524
317	3	16.255	1	F	1	84	85.1	-1.1	-9.1	29.9	4	5.5	25.9	35.4	92.8	2	61.1	57.1	0.934534	93.4534	3.1	0.0507365	5.07365	32.4	0.530278	53.0278	27.9	0.456628	45.6628
271	2	18.968	1	F	1	87.9	81.6	6.3	-1	32.3	12.5	3.5	19.8	35.7	98.9	2	63.6	66.3	1.04245	104.245	-5.3	-0.0833333	-8.33333	39	0.613208	61.3208	22.1	0.347484	34.7484
059	3	16.761	1	F	1	79.3	80.2	-0.9	-8.1	23	2	13.1	21	36.1	88	2	66.1	59.5	0.900151	90.0151	4.3	0.065053	6.5053	35	0.529501	52.9501	28.8	0.435703	43.5703
056	3	19.05	1	F	1	76.4	80.6	-4.2	-7.4	31	1.7	5.3	29.3	36.2	83.5	2	66.7	56.2	0.842579	84.2579	10	0.149925	14.9925	35.1	0.526237	52.6237	31.1	0.466267	46.6267
034	1	16.786	1	F	1	79.4	76.1	3.3	-2.4	26.3	6.5	10.1	19.8	36.3	88.9	2	61.1	57.5	0.94108	94.108	1.1	0.0180033	1.80033	32.9	0.538462	53.8462	25.7	0.420622	42.0622
264	3	24.34	1	M	0	84.3	91.1	-6.8	-26.4	27.2	5.9	9.4	21.2	36.6	92.8	2	70.7	68.1	0.963225	96.3225	0.1	0.00141443	0.141443	41.9	0.592645	59.2645	26.3	0.371994	37.1994
302	2	16.249	1	F	1	81.5	77	4.5	-1	28.3	8.2	8.7	20	36.9	92.2	2	66.4	62.9	0.947289	94.7289	0.6	0.00903614	0.903614	35.4	0.533133	53.3133	28.1	0.423193	42.3193
130	2	25.15	1	F	1	85.4	77.4	8	5	24.3	7.9	12.7	16.4	37	98.9	2	61.4	61.4	1	100	-3.9	-0.0635179	-6.35179	36.5	0.594463	59.4463	21	0.34202	34.202
201	2	22.538	1	M	0	80.2	75.1	5.1	-2.9	28.1	3.3	9.2	24.8	37.3	93.4	3	68.3	63	0.922401	92.2401	3.7	0.0541728	5.41728	36.7	0.537335	53.7335	30	0.439239	43.9239
021	1	27.557	1	M	0	79.6	79.6	0	-4.9	27.5	-0.9	10.2	28.4	37.7	91.4	3	72.3	62.5	0.864454	86.4454	8.8	0.121715	12.1715	37.2	0.514523	51.4523	34.2	0.473029	47.3029
263	1	24.288	1	M	0	81.4	77.6	3.8	-1.1	31.4	6.1	6.4	25.3	37.8	94.5	3	74.1	67.5	0.910931	91.0931	4.8	0.0647773	6.47773	42.3	0.57085	57.085	30	0.404858	40.4858
105	2	20.381	1	M	0	87	75.9	11.1	3.4	25.6	-1.6	12.4	27.2	37.9	92.7	3	65.9	63.5	0.963581	96.3581	1.3	0.0197269	1.97269	35.9	0.544765	54.4765	28.8	0.437026	43.7026
124	2	23.447	1	F	1	84.6	76.3	8.3	4.5	32.9	8.7	5.5	24.1	38.3	89.9	3	70.3	67.3	0.957326	95.7326	0.8	0.0113798	1.13798	38.4	0.54623	54.623	29.7	0.422475	42.2475
127	2	25.739	1	F	1	83.9	79.1	4.7	-1.4	29.3	0.5	9.2	28.8	38.5	89.9	3	66.5	61.2	0.920301	92.0301	4.4	0.0661654	6.61654	35.8	0.538346	53.8346	29.8	0.44812	44.812
328	2	31.552	1	F	1	80.8	75.8	5	4.7	23.7	-1.5	15	25.2	38.7	90.7	3	64.7	59	0.911901	91.1901	4	0.0618238	6.18238	33.7	0.520866	52.0866	29.2	0.451314	45.1314
074	3	42.594	1	F	1	81.8	82.4	-0.6	-6.5	28.9	0.7	9.8	28.3	38.7	91.8	3	65.2	60.2	0.923313	92.3313	3.9	0.059816	5.9816	35.3	0.541411	54.1411	28.8	0.441718	44.1718
284	1	20.994	1	F	1	81.6	77.9	3.7	-5.6	28.6	6.8	10.5	21.8	39.1	94.2	3	63.7	61.5	0.965463	96.5463	-0.8	-0.0125589	-1.25589	34	0.533752	53.3752	26.8	0.420722	42.0722
061	2	51.946	1	F	1	79.1	69.2	9.9	1.6	26.2	-1.1	12.9	27.3	39.1	92.4	3	61	53.2	0.872131	87.2131	6.5	0.106557	10.6557	30.6	0.501639	50.1639	29.1	0.477049	47.7049
131	2	24.715	1	F	1	77.4	72.9	4.5	-3.4	27.9	5.1	11.3	22.8	39.2	88.6	3	64.1	58.1	0.906396	90.6396	3.4	0.0530421	5.30421	33.2	0.517941	51.7941	28.3	0.441498	44.1498
259	2	23.365	1	F	1	78.4	71.3	7	5.9	30.8	12.9	8.7	17.9	39.5	93.2	3	75.8	71.9	0.948549	94.8549	-1.4	-0.0184697	-1.84697	41.3	0.544855	54.4855	29.2	0.385224	38.5224
121	2	23.163	1	F	1	82.4	73.8	8.7	6.1	32.4	2.5	7.2	29.8	39.6	89.3	3	64.7	59	0.911901	91.1901	4.8	0.0741886	7.41886	34.2	0.528594	52.8594	29.6	0.457496	45.7496
077	3	29.756	1	F	1	72	74.8	-2.8	-9.3	26.3	4.7	13.4	21.6	39.6	88.2	3	64.5	55.8	0.865116	86.5116	5.6	0.0868217	8.68217	31.3	0.485271	48.5271	30.1	0.466667	46.6667
365	3	19.779	1	F	1	76.6	77.4	-0.7	-7.2	28.3	7.3	11.6	21.1	40	89.6	3	63.3	58.8	0.92891	92.891	1.1	0.0173776	1.73776	35.9	0.567141	56.7141	24	0.379147	37.9147
312	3	21.504	1	M	0	81.2	84.2	-3	-15.4	31.4	3.7	8.6	27.7	40	94.4	3	65.3	60.2	0.921899	92.1899	3.6	0.0551302	5.51302	34.8	0.532925	53.2925	29	0.444104	44.4104
123	2	21.816	1	F	1	75.8	70.7	5.1	4.8	29.7	6.4	10.6	23.2	40.2	85.6	3	66.3	59.9	0.903469	90.3469	3.5	0.0527903	5.27903	33.5	0.505279	50.5279	29.9	0.45098	45.098
345	3	21.553	1	M	0	74.2	75.4	-1.1	-9.8	19.3	-3.6	20.9	22.9	40.2	90	3	66.6	58.9	0.884384	88.4384	4.8	0.0720721	7.20721	34.7	0.521021	52.1021	29	0.435435	43.5435
313	2	23.341	1	F	1	81.3	75.3	6	-3	33.5	10.1	6.8	23.4	40.3	88.5	3	65	61.6	0.947692	94.7692	0.6	0.00923077	0.923077	35.8	0.550769	55.0769	26.4	0.406154	40.6154
361	3	18.404	1	F	1	78.8	79.2	-0.4	-7.8	33.5	6.1	7	27.4	40.5	88.9	3	57.5	52.3	0.909565	90.9565	3.7	0.0643478	6.43478	30.7	0.533913	53.3913	25.3	0.44	44
279	1	20.156	1	M	0	80.6	77.7	3	-3.6	25.8	1.3	14.9	24.5	40.7	93.2	3	63.9	60	0.938967	93.8967	1.4	0.0219092	2.19092	34.6	0.541471	54.1471	26.8	0.419405	41.9405
370	3	18.549	1	F	1	79.4	79.9	-0.5	-7	28.8	1.1	12.1	27.8	41	86.1	3	63.1	59.1	0.936609	93.6609	2.3	0.0364501	3.64501	35.7	0.565769	56.5769	25.7	0.40729	40.729
005	2	25.361	1	F	1	80.1	72	8.2	0.2	30.2	3.6	11	26.6	41.2	92	3	66.7	59.6	0.893553	89.3553	5	0.0749625	7.49625	34.8	0.521739	52.1739	29.8	0.446777	44.6777
278	2	21.216	1	F	1	79.9	72.2	7.7	5.4	31.1	6.4	10.3	24.7	41.4	87.3	3	67.2	62.2	0.925595	92.5595	2.2	0.0327381	3.27381	38.1	0.566964	56.6964	26.3	0.391369	39.1369
164	2	65.083	1	F	1	82.7	77.5	5.2	-0.2	34.6	2.2	6.9	32.4	41.5	95.3	3	59.7	53.9	0.902848	90.2848	5.1	0.0854271	8.54271	30.7	0.514238	51.4238	28.2	0.472362	47.2362
126	2	23.245	1	F	1	81	75.9	5.1	0.4	30.9	-2	10.7	32.9	41.6	90.7	3	63.3	56	0.884676	88.4676	6.6	0.104265	10.4265	32.9	0.519747	51.9747	29.7	0.469194	46.9194
346	3	30.76	1	M	0	68.9	74.2	-5.3	-13.8	35.4	7	6.3	28.4	41.7	79.6	3	68.8	55.7	0.809593	80.9593	11.2	0.162791	16.2791	35.5	0.515988	51.5988	31.5	0.457849	45.7849
171	2	18.374	1	F	1	76.3	72	4.3	-2.3	27.8	4.8	14	23	41.8	93.6	3	59.3	54.3	0.915683	91.5683	1.9	0.0320405	3.20405	33.7	0.568297	56.8297	22.5	0.379427	37.9427
129	2	27.417	1	F	1	82.1	76	6.1	-1.1	37.4	13.5	5.1	23.9	42.6	92.9	3	61.7	58.7	0.951378	95.1378	-0.3	-0.00486224	-0.486224	33.7	0.546191	54.6191	24.7	0.400324	40.0324
044	3	18.429	1	M	0	85.6	85.7	-0.2	-21.4	34	-2.7	8.8	36.7	42.8	94.4	3	63.1	57.5	0.911252	91.1252	5.3	0.0839937	8.39937	34.9	0.55309	55.309	27.8	0.440571	44.0571
363	3	26.807	1	F	1	70.7	74.2	-3.5	-14.5	35.6	7	7.5	28.5	43	85.2	3	66.4	56.6	0.85241	85.241	7.7	0.115964	11.5964	34	0.512048	51.2048	30.3	0.456325	45.6325
331	2	25.892	1	F	1	80.8	73.3	7.5	0.8	33.2	1.9	11.5	31.3	44.7	90.5	3	61.6	57.5	0.933442	93.3442	2.4	0.038961	3.8961	33.1	0.537338	53.7338	26.8	0.435065	43.5065
238	3	19.801	1	M	0	73.6	80.1	-6.6	-18.6	33.2	-3.1	12.8	36.3	46.1	86.7	3	73.5	61.6	0.838095	83.8095	10.8	0.146939	14.6939	34.4	0.468027	46.8027	38	0.517007	51.7007
125	2	39.596	1	F	1	82.5	73.6	8.9	2.4	44.7	18.6	5.5	26.1	50.2	96	3	57.1	62.4	1.09282	109.282	-10.2	-0.178634	-17.8634	36.3	0.635727	63.5727	15.8	0.276708	27.6708
294	3	33.2	1	F	1	70.3	71.4	-1.1	-12.5	40.6	6.4	12.3	34.2	52.9	79.1	3	58.8	50.7	0.862245	86.2245	4.9	0.0833333	8.33333	31.3	0.532313	53.2313	24.4	0.414966	41.4966
																							0.884493

## Sheet: SJSN
Flat SJ /SN x 100 ˂ 86.65			1	Groups	SN/H	SNA	SNB	ANB	AoBo	PP/MP	PP/H	MP/H	SN/MP	ANS-PNS	maxillary depth
n= 35				1	2.7	74.4	78.1	-3.8	-1.2	18.3	-6.3	24.5	27.2	52	83.3
mean =	91.46±4.81			1	0.2	82.4	88.5	-6.1	-7.9	13	-5.3	18.3	18.6	53.9	88
Normal toward Flat 86.65˂SJ/SN x 100 ˂91.46			2	1	13.3	68.9	74.2	-5.3	-13.8	35.4	7	28.4	41.7	50.8	79.6
n= 52				1	3.8	78.5	85.9	-7.5	-16.5	24.6	-1.6	26.2	29.9	52.8	88.9
				1	4.7	78.4	84.2	-5.9	-6.9	28	1.7	26.3	31	47.6	90.3
Normal toward Full 91.46˂SJ/SN x 100 ˂96.27			3	1	5.4	79.8	78.9	0.9	-3.8	22.8	-6.6	29.4	34.8	54.1	91.1
n= 69				1	0.9	83	82.3	0.7	-0.4	15.5	-8.1	23.5	24.5	57	90.3
				1	4.7	79.4	83.4	-4	-7.6	17.1	-3.9	21	25.7	55.3	84.5
Full SJ /SN x 100 ˃ 96.27			4	1	9.7	73.6	80.1	-6.6	-18.6	33.2	-3.1	36.3	46.1	58.9	86.7
n= 27				1	0.9	82.2	84.4	-2.2	-6.6	15.6	-7.2	22.7	23.7	56.6	89.8
				1	9	76.8	79.4	-2.6	-6.6	23.3	1.1	22.3	31.3	47.8	87.1
				1	1.8	84.5	87.7	-3.2	-11.3	18.2	-5.8	23.9	25.7	53.7	95.4
				1	6.7	77.5	80.7	-3.2	-0.3	25	-1.1	26.1	32.8	52.4	87.4
				1	7	76.4	80.6	-4.2	-7.4	31	1.7	29.3	36.2	50.7	83.5
				1	6.3	80.2	77.2	3	3.4	14.3	-1.5	15.8	22.1	55.7	90.1
				1	10	75.9	77.7	-1.8	-6.3	14.6	-1	15.7	25.7	51.1	87.5
				1	8.1	75.9	73.2	2.7	7.7	19.3	0.9	18.3	26.4	56.4	87.5
				1	14.5	70.7	74.2	-3.5	-14.5	35.6	7	28.5	43	51.4	85.2
				1	2.5	83.5	84.5	-1	-6.6	11.9	-10.5	22.4	25	50.9	94.4
				1	14.3	73.7	77.9	-4.2	-7.4	21.1	6.2	15	29.2	45.1	84.5
				1	14.4	74.2	71.4	2.8	5.1	19.5	7	12.5	26.9	49	87.8
				1	6.6	80.1	80	0	-6.7	11.5	-7	18.5	25.2	51.4	87.8
				1	6.6	81.5	78.1	3.4	3.1	11.6	-3.5	15.1	21.7	55.6	85.9
				1	17.3	72.5	72.8	-0.3	-2.7	20.9	6.9	14	31.3	48.3	83
				1	18.7	70.3	71.4	-1.1	-12.5	40.6	6.4	34.2	52.9	42.8	79.1
				1	14.8	78.9	74	4.9	5.9	19.9	7.3	12.6	27.4	50.6	90.3
				1	10.8	72.9	70	2.8	3.7	20	-3	22.9	33.7	53.6	84.8
				1	6.7	80.6	82.8	-2.2	-6.9	22.9	2.4	20.4	27.2	58.3	88.8
				1	9.3	79.6	79.6	0	-4.9	27.5	-0.9	28.4	37.7	58.9	91.4
				1	6.2	80	84.6	-4.7	-15.2	17.9	-4	21.9	28.1	54.2	90.2
				1	7.9	81.9	81.5	0.3	-6.8	21.7	-3	24.7	32.7	53	92.3
				1	18	72	74.8	-2.8	-9.3	26.3	4.7	21.6	39.6	54.1	88.2
				1	9.3	77.5	79.7	-2.2	-6.9	20.1	0.2	19.9	29.2	51.7	86.1
				1	12.9	75.4	70.6	4.8	6.1	17.3	-5	22.3	35.3	60.7	89.6
				1	8.2	81.8	95	-13.2	-19	11	0.8	10.1	18.4	61.4	85.6
				2	9.9	79.8	78.7	1.1	1.3	13.5	0.9	12.5	22.4	58.1	88.2
				2	11.8	79.1	69.2	9.9	1.6	26.2	-1.1	27.3	39.1	47.4	92.4
				2	8.5	82.7	83.3	-0.5	-8.3	16.4	3.7	12.7	21.2	51.2	91.7
				2	8.3	80.6	82.2	-1.6	-12.2	23.4	0	23.4	31.7	53.7	89.2
				2	0.4	84.5	85.2	-0.7	2.1	10.6	-1.4	11.9	12.3	63.5	92.5
				2	1.3	85.5	86.3	-0.8	-2.3	12	-7.3	19.3	20.6	55.9	90
				2	3.4	86	87.2	-1.2	-4.8	26	-1.3	27.3	30.7	53.5	92.9
				2	6.7	83	78.1	5	1	19.9	-0.2	20.1	26.8	55.7	90.3
				2	1.8	86	82.7	3.3	-1.7	21.7	-3.2	24.9	26.6	52.3	94.9
				2	10.2	79.2	78.8	0.4	-5.5	26	1	25	35.2	56.4	90.8
				2	13	76.7	73.6	3.1	3.4	22.3	1	21.3	34.4	52.2	84
				2	17.4	76	79.1	-3.1	-12.2	23.6	6.8	16.9	34.2	53.8	82.1
				2	17.3	74.2	75.4	-1.1	-9.8	19.3	-3.6	22.9	40.2	51.1	90
				2	8.7	81	75.9	5.1	0.4	30.9	-2	32.9	41.6	51.6	90.7
				2	14.6	76.2	79.6	-3.4	-7.4	17.7	6.9	10.8	25.4	46.6	88.1
				2	13.6	80.9	72.2	8.7	3.7	30	10.8	19.2	32.8	52.3	88.9
				2	11.1	79.8	76.8	3	-0.6	24.9	9.6	15.3	26.4	53	91.5
				2	9.9	79.5	76.1	3.4	0.4	21.9	1	20.9	30.8	50.8	86.5
				2	6.8	83.8	79.4	4.4	4.9	5.1	-5.5	10.5	17.3	60	94.2
				2	11.5	79.8	77.5	2.2	-0.3	18.7	4.7	14.1	25.6	53	87.4
				2	5.6	84.5	90.9	-6.4	-11.8	16	-1.1	17.1	22.7	55.5	90.4
				2	9.7	78.9	77.9	0.9	-3.2	11.4	-8.8	20.1	29.8	52.5	87.8
				2	14.6	80.1	72	8.2	0.2	30.2	3.6	26.6	41.2	55.7	92
				2	11.4	78.3	80.6	-2.3	-6.7	20.6	2.3	18.3	29.7	52.2	88.3
				2	12.7	80.9	77	3.8	-0.8	20.3	1	19.2	31.9	45.6	91.3
				2	14.6	77.2	75.7	1.5	-5	22.8	6.2	16.6	31.2	52.8	84.9
				2	9.8	78.4	80.8	-2.4	-12.8	19.5	-1.9	21.4	31.1	48.9	87.1
				2	15.9	80.2	82.1	-1.9	-9.9	26.9	9.8	17.2	33	57.8	91.5
				2	15.2	78	82.4	-4.4	-12.6	20.5	6.2	14.2	29.5	58.2	85.6
				2	8.4	82.8	76.3	6.5	3.9	17.6	-1.2	18.8	27.3	56.4	94.6
				2	8.4	83.5	79.4	4.1	-1.4	13.2	-1.8	15	23.4	55.8	92.2
				2	11.4	82.8	77.7	5.1	8.5	23.3	4.6	18.7	30.1	55.9	93.6
				2	15.1	79.3	80.2	-0.9	-8.1	23	2	21	36.1	48.4	88
				2	9.2	82.7	77.5	5.2	-0.2	34.6	2.2	32.4	41.5	44.8	95.3
				2	17	75.8	70.7	5.1	4.8	29.7	6.4	23.2	40.2	51.9	85.6
				2	9.4	83	82	1.1	-6.7	17.7	-2.5	20.2	29.6	54.9	92.9
				2	12.8	77.5	84	-6.5	-17	15.2	6.6	8.6	21.4	55.9	89.5
				2	16.4	77.4	72.9	4.5	-3.4	27.9	5.1	22.8	39.2	51.2	88.6
				2	7.7	86	79.7	6.3	3.4	23.3	-0.9	24.2	31.9	56.7	91.4
				2	7.5	84.1	85	-0.9	-7.9	17.4	1	16.4	23.9	50.2	90.8
				2	13.1	78.8	79.2	-0.4	-7.8	33.5	6.1	27.4	40.5	45.6	88.9
				2	4.8	87.3	81	6.3	1.9	18.6	-1.4	20	24.8	60.2	97.6
				2	9.5	82.4	86.6	-4.2	-11.4	16.1	1.8	14.3	23.7	47.5	89.8
				2	12.6	81.4	77.6	3.8	-1.1	31.4	6.1	25.3	37.8	55.2	94.5
				2	6.1	85.6	85.7	-0.2	-21.4	34	-2.7	36.7	42.8	55	94.4
				2	5.8	87.1	79.6	7.5	3.4	24	4	20	25.8	55.4	95.2
				2	9.8	82.4	73.8	8.7	6.1	32.4	2.5	29.8	39.6	49.5	89.3
				2	13.5	80.8	75.8	5	4.7	23.7	-1.5	25.2	38.7	46.6	90.7
				2	13.1	84.2	79.9	4.3	3.2	23	5.6	17.4	30.5	64.1	91.6
				2	11.1	79.6	76	3.6	-0.7	20.4	1.8	18.6	29.7	50.1	90.3
				2	15.6	79	73.8	5.2	1.6	18.1	1.3	16.8	32.4	51.1	90.4
				2	9.8	84.1	79	5	-0.2	23.6	6.1	17.5	27.3	52.6	91.5
				3	18.8	76.3	72	4.3	-2.3	27.8	4.8	23	41.8	49.6	93.6
				3	11.1	80.9	79.6	1.3	-2.2	10.2	-0.3	10.6	21.7	49.3	90.1
				3	13.2	82.1	78	4.1	2.3	21.4	4	17.4	30.6	51.4	89.8
				3	18.9	76	73.8	2.2	-3.9	22	6.6	15.5	34.3	51.6	91.2
				3	13.8	81.9	76.3	5.7	5.3	21.5	0.6	20.9	34.7	49	96.8
				3	9.7	83.9	79.1	4.7	-1.4	29.3	0.5	28.8	38.5	49.6	89.9
				3	7.3	82.9	84.3	-1.4	-5.9	9.8	-3	12.8	20.1	53.8	91.4
				3	12.3	81.2	84.2	-3	-15.4	31.4	3.7	27.7	40	53.8	94.4
				3	12.5	80.2	75.1	5.1	-2.9	28.1	3.3	24.8	37.3	53.2	93.4
				3	12.2	80.5	81.5	-1	-5.8	26.4	7.9	18.5	30.7	49.4	87.6
				3	10.4	81.8	82.4	-0.6	-6.5	28.9	0.7	28.3	38.7	50.9	91.8
				3	15.2	79.8	77.9	1.9	-5.5	19.5	5.7	13.9	29	50.4	92.9
				3	4.8	84.9	90.4	-5.6	-6.3	15.9	-0.6	16.5	21.3	54.9	89.5
				3	16.7	79.9	72.2	7.7	5.4	31.1	6.4	24.7	41.4	47.7	87.3
				3	2.9	90.3	87.7	2.6	-2.1	13.1	-3.6	16.7	19.5	52.4	95
				3	11.6	81.2	77.6	3.6	2	14.6	1.4	13.2	24.8	63.8	96
				3	8.2	84.5	82.9	1.7	-2.2	15	1.1	13.9	22.1	48.1	94.5
				3	10.6	82.9	78.5	4.5	-1.1	19	3.1	15.9	26.5	49.7	89.4
				3	9.6	84.5	77.8	6.8	3.2	19	0.2	18.8	28.4	53.4	93.1
				3	7.3	84.2	81.8	2.4	-2.4	20.5	-1.4	21.8	29.2	58.4	97.6
				3	9.4	85.8	81.9	3.9	0	21.8	4.8	17	26.4	49.2	91.9
				3	11.8	82.4	78	4.4	2.9	13.5	-2.2	15.7	27.4	54.6	96.4
				3	18.9	76.6	77.4	-0.7	-7.2	28.3	7.3	21.1	40	46.7	89.6
				3	11.2	83.7	79	4.7	-2.7	25.9	2	23.8	35	50.8	88.9
				3	13.1	82.7	78.9	3.8	-1.2	19.4	5.3	14.2	27.3	58.7	92.9
				3	4.4	87.5	87.8	-0.3	-2.6	14.8	-1	15.8	20.1	57.3	89.4
				3	4.3	89.8	87.9	1.9	-5.1	15.4	-0.2	15.6	20	52.9	90.9
				3	13.4	80.8	73.3	7.5	0.8	33.2	1.9	31.3	44.7	51.6	90.5
				3	10.5	82.7	77.6	5.2	5	20.2	0.6	19.6	30.1	57.5	92.4
				3	7.9	86.4	80.3	6.1	5.8	20.8	0.6	20.2	28.1	49	90.1
				3	9.5	84	85.1	-1.1	-9.1	29.9	4	25.9	35.4	47.3	92.8
				3	3.9	92.2	81.8	10.4	7.1	21.8	1.8	20	23.8	56.3	96.4
				3	13.2	79.4	79.9	-0.5	-7	28.8	1.1	27.8	41	48.6	86.1
				3	6	87.2	80.7	6.5	3.3	20.2	0.2	20	26.1	53.7	88.3
				3	8.7	85.4	77.6	7.8	6.2	16.1	-3.5	19.6	28.3	54.8	91.3
				3	12.9	83.7	78.4	5.3	-0.7	19.9	3.4	16.5	29.4	54.4	94.1
				3	13.6	84.3	79.1	5.2	6.1	11.1	5.4	5.7	19.3	59.9	93.1
				3	4.5	87.7	79.1	8.6	6.3	31.3	6.6	24.7	29.2	54	91.8
				3	11.4	83.6	78.3	5.3	4.9	9.1	2.8	6.2	17.6	56.6	90.3
				3	16.2	80.6	77.7	3	-3.6	25.8	1.3	24.5	40.7	54.3	93.2
				3	9	85.3	85.6	-0.2	-6.1	18.2	-1	19.2	28.1	49.8	95.7
				3	8.5	83.3	82.9	0.4	-6.9	21.8	0.2	21.6	30.1	58.1	90
				3	16.5	79.4	76.1	3.3	-2.4	26.3	6.5	19.8	36.3	50.7	88.9
				3	10.3	85.2	87.8	-2.7	-11.6	21.6	0.7	20.9	31.2	49.8	89.7
				3	11.1	84.8	83.5	1.3	-4.3	34	12	22	33.1	58.6	95.1
				3	8.4	86.8	81.8	5	-2.5	18.5	0.7	17.8	26.2	47.4	93.8
				3	9	85.3	82.2	3.1	-3.8	30.2	6.7	23.6	32.6	51.3	94
				3	13.7	83	78.7	4.3	2.4	25.1	5.9	19.2	32.8	58.4	91.9
				3	18.4	76.9	74.2	2.7	4.5	21	5.5	15.5	33.8	53.6	86.9
				3	16.9	81.5	77	4.5	-1	28.3	8.2	20	36.9	51.6	92.2
				3	16.9	81.3	75.3	6	-3	33.5	10.1	23.4	40.3	49.3	88.5
				3	8.7	86.5	79.7	6.8	3.8	20.8	0.6	20.2	28.9	55.8	93.9
				3	17	81.1	76.1	5	3.8	14.4	6.9	7.6	24.6	52	91.3
				3	11.3	85.9	79.7	6.2	2.2	20.6	3.1	17.5	28.8	52.3	94.5
				3	21.6	78.4	71.3	7	5.9	30.8	12.9	17.9	39.5	58.1	93.2
				3	10.4	83.4	83.9	-0.4	-4.2	21.1	3	18.1	28.5	64.1	96.4
				3	6.6	86.8	80.8	5.9	-0.6	12	-1.9	13.8	20.4	51.9	93.3
				3	10.1	84.1	80.4	3.7	-4.7	24.2	0.3	23.8	33.9	50.1	94.7
				3	14.2	80.5	74.6	5.9	-1.1	21.1	2.4	18.7	32.9	54.2	93.2
				3	18.6	82.1	76	6.1	-1.1	37.4	13.5	23.9	42.6	50	92.9
				3	11.1	84.1	80.2	3.9	-1	18.1	-1.3	19.4	30.5	52.8	91.1
				3	2.7	91.2	87	4.2	-2.4	14.7	-6.8	21.6	24.3	57.5	95.9
				3	14.1	83.1	78.7	4.4	-1.7	19.2	0.1	19.1	33.2	57.3	96.5
				3	14.2	84.6	76.3	8.3	4.5	32.9	8.7	24.1	38.3	56.1	89.9
				3	9.7	85.8	81.6	4.2	-6	24	1.2	22.8	32.5	56.7	99.8
				3	14.1	84.1	74.1	10	7.9	24.8	6.4	18.4	32.5	54	89.2
				3	14.8	82.1	75.1	6.9	2.9	21	1.6	19.4	34.2	45.8	91.5
				3	9.1	85.4	83.2	2.2	-5.5	25.4	1.7	23.6	32.7	52.3	92
				3	8	87.5	85.1	2.4	1.8	-3	0.3	-3.4	4.6	62.3	98
				4	15.3	84.3	91.1	-6.8	-26.4	27.2	5.9	21.2	36.6	48.6	92.8
				4	15.3	84.3	91.1	-6.8	-26.4	27.2	5.9	21.2	36.6	48.6	92.8
				4	10.8	87	75.9	11.1	3.4	25.6	-1.6	27.2	37.9	53.9	92.7
				4	4.6	92	86.2	5.8	0	21.5	1.4	20.1	24.7	59.9	94.5
				4	17.4	81.6	77.9	3.7	-5.6	28.6	6.8	21.8	39.1	52.1	94.2
				4	1.4	92.9	85.7	7.2	-5.6	31.9	-2	33.9	35.3	55.2	98.7
				4	7.7	89.4	82.8	6.6	-3.6	19.1	-0.6	19.8	27.5	54	94
				4	14.1	83.7	77.5	6.2	5.8	20.3	5.4	15	29.1	55.5	96.7
				4	10.4	87.1	90.1	-3	-8.7	16.8	6.3	10.5	20.8	53.7	91.5
				4	13.4	84.3	81.7	2.6	-1.3	18.4	1.7	16.8	30.2	52	93.4
				4	17.5	84.5	84.3	0.1	-5.8	19.9	9.5	10.4	27.9	49	92.6
				4	17.2	82.8	74.5	8.3	4.2	19.4	5.9	13.6	30.8	55.7	89.4
				4	13.3	83.5	75	8.4	1	17.9	-3.1	21	34.3	48.4	92.8
				4	6.9	88.2	87	1.2	-2.7	15.9	-2.2	18.2	25	46.6	95.8
				4	5.4	92.8	87.7	5.1	0.3	13.1	1.7	11.4	16.8	61.7	96
				4	14.4	84.9	79.3	5.6	0.2	20.1	7.9	12.2	26.6	53.9	89.2
				4	13.4	85	79.1	5.9	-5.1	21.1	0.2	20.9	34.3	51.9	93.1
				4	12.3	87.5	81.2	6.2	6.8	11.8	3.8	7.9	20.2	61.1	99.1
				4	17	82.5	75	7.5	9.4	12	3.9	8.1	25.2	54.6	93.8
				4	16.6	87.5	80.9	6.6	0.9	15.4	7.8	7.7	24.3	54.8	98.3
				4	19.3	83.2	79	4.2	-4.2	23.6	9.4	14.2	33.5	49.6	96.3
				4	9.2	90.1	85.1	5	0.7	14	1.1	12.9	22.1	61	100.3
				4	13.3	86.3	80.9	5.4	1.1	17.4	4.1	13.3	26.6	51.3	86
				4	20.6	85.4	77.4	8	5	24.3	7.9	16.4	37	50.3	98.9
				4	20.4	83	75.3	7.7	3.4	14.8	10.9	3.9	24.3	54.6	93.1
				4	15.3	87.3	80.7	6.7	2.2	18.1	5.6	12.5	27.8	51.5	92.6
				4	16	87.9	81.6	6.3	-1	32.3	12.5	19.8	35.7	47.9	98.9

## Sheet: SGSN
Flat SG /SN x 100 ˂ 50.2			1	Groups	SN/H	SNA	SNB	ANB	AoBo	PP/MP	PP/H	MP/H	SN/MP	ANS-PNS	maxillary depth
n=29				1	0.2	82.4	88.5	-6.1	-7.9	13	-5.3	18.3	18.6	53.9	88
mean =	53.45±3.25			1	5.4	79.8	78.9	0.9	-3.8	22.8	-6.6	29.4	34.8	54.1	91.1
Normal toward Flat 50.2˂SG/SN x 100 ˂53.45				1	9.7	73.6	80.1	-6.6	-18.6	33.2	-3.1	36.3	46.1	58.9	86.7
n= 64			2	1	3.8	78.5	85.9	-7.5	-16.5	24.6	-1.6	26.2	29.9	52.8	88.9
				1	6.7	80.6	82.8	-2.2	-6.9	22.9	2.4	20.4	27.2	58.3	88.8
Normal toward Full 53.45˂SG/SN x 100 ˂56.7			3	1	0.9	83	82.3	0.7	-0.4	15.5	-8.1	23.5	24.5	57	90.3
n= 62				1	0.9	82.2	84.4	-2.2	-6.6	15.6	-7.2	22.7	23.7	56.6	89.8
				1	4.7	79.4	83.4	-4	-7.6	17.1	-3.9	21	25.7	55.3	84.5
Full SG /SN x 100 ˃ 56.7			4	1	6.3	80.2	77.2	3	3.4	14.3	-1.5	15.8	22.1	55.7	90.1
n= 28				1	4.7	78.4	84.2	-5.9	-6.9	28	1.7	26.3	31	47.6	90.3
				1	9	76.8	79.4	-2.6	-6.6	23.3	1.1	22.3	31.3	47.8	87.1
				1	6.7	77.5	80.7	-3.2	-0.3	25	-1.1	26.1	32.8	52.4	87.4
				1	1.3	85.5	86.3	-0.8	-2.3	12	-7.3	19.3	20.6	55.9	90
				1	18	72	74.8	-2.8	-9.3	26.3	4.7	21.6	39.6	54.1	88.2
				1	9.7	78.9	77.9	0.9	-3.2	11.4	-8.8	20.1	29.8	52.5	87.8
				1	14.4	74.2	71.4	2.8	5.1	19.5	7	12.5	26.9	49	87.8
				1	1.8	86	82.7	3.3	-1.7	21.7	-3.2	24.9	26.6	52.3	94.9
				1	10.8	72.9	70	2.8	3.7	20	-3	22.9	33.7	53.6	84.8
				1	6.7	83	78.1	5	1	19.9	-0.2	20.1	26.8	55.7	90.3
				1	6.6	80.1	80	0	-6.7	11.5	-7	18.5	25.2	51.4	87.8
				1	1.8	84.5	87.7	-3.2	-11.3	18.2	-5.8	23.9	25.7	53.7	95.4
				1	15.9	80.2	82.1	-1.9	-9.9	26.9	9.8	17.2	33	57.8	91.5
				1	8.1	75.9	73.2	2.7	7.7	19.3	0.9	18.3	26.4	56.4	87.5
				1	6.6	81.5	78.1	3.4	3.1	11.6	-3.5	15.1	21.7	55.6	85.9
				1	10	75.9	77.7	-1.8	-6.3	14.6	-1	15.7	25.7	51.1	87.5
				1	12.9	75.4	70.6	4.8	6.1	17.3	-5	22.3	35.3	60.7	89.6
				1	2.7	74.4	78.1	-3.8	-1.2	18.3	-6.3	24.5	27.2	52	83.3
				1	17.3	72.5	72.8	-0.3	-2.7	20.9	6.9	14	31.3	48.3	83
				1	11.8	79.1	69.2	9.9	1.6	26.2	-1.1	27.3	39.1	47.4	92.4
				2	9.9	79.8	78.7	1.1	1.3	13.5	0.9	12.5	22.4	58.1	88.2
				2	6.2	80	84.6	-4.7	-15.2	17.9	-4	21.9	28.1	54.2	90.2
				2	13	76.7	73.6	3.1	3.4	22.3	1	21.3	34.4	52.2	84
				2	8.4	83.5	79.4	4.1	-1.4	13.2	-1.8	15	23.4	55.8	92.2
				2	17	75.8	70.7	5.1	4.8	29.7	6.4	23.2	40.2	51.9	85.6
				2	5.6	84.5	90.9	-6.4	-11.8	16	-1.1	17.1	22.7	55.5	90.4
				2	7.9	81.9	81.5	0.3	-6.8	21.7	-3	24.7	32.7	53	92.3
				2	8.4	82.8	76.3	6.5	3.9	17.6	-1.2	18.8	27.3	56.4	94.6
				2	14.8	78.9	74	4.9	5.9	19.9	7.3	12.6	27.4	50.6	90.3
				2	8.2	81.8	95	-13.2	-19	11	0.8	10.1	18.4	61.4	85.6
				2	3.4	86	87.2	-1.2	-4.8	26	-1.3	27.3	30.7	53.5	92.9
				2	13.6	80.9	72.2	8.7	3.7	30	10.8	19.2	32.8	52.3	88.9
				2	10.2	79.2	78.8	0.4	-5.5	26	1	25	35.2	56.4	90.8
				2	12.8	77.5	84	-6.5	-17	15.2	6.6	8.6	21.4	55.9	89.5
				2	14.5	70.7	74.2	-3.5	-14.5	35.6	7	28.5	43	51.4	85.2
				2	6	87.2	80.7	6.5	3.3	20.2	0.2	20	26.1	53.7	88.3
				2	0.4	84.5	85.2	-0.7	2.1	10.6	-1.4	11.9	12.3	63.5	92.5
				2	9.2	82.7	77.5	5.2	-0.2	34.6	2.2	32.4	41.5	44.8	95.3
				2	9.3	79.6	79.6	0	-4.9	27.5	-0.9	28.4	37.7	58.9	91.4
				2	13.3	68.9	74.2	-5.3	-13.8	35.4	7	28.4	41.7	50.8	79.6
				2	11.4	78.3	80.6	-2.3	-6.7	20.6	2.3	18.3	29.7	52.2	88.3
				2	13.1	84.2	79.9	4.3	3.2	23	5.6	17.4	30.5	64.1	91.6
				2	16.4	77.4	72.9	4.5	-3.4	27.9	5.1	22.8	39.2	51.2	88.6
				2	6.8	83.8	79.4	4.4	4.9	5.1	-5.5	10.5	17.3	60	94.2
				2	8.7	81	75.9	5.1	0.4	30.9	-2	32.9	41.6	51.6	90.7
				2	7.3	84.2	81.8	2.4	-2.4	20.5	-1.4	21.8	29.2	58.4	97.6
				2	11.1	84.8	83.5	1.3	-4.3	34	12	22	33.1	58.6	95.1
				2	13.5	80.8	75.8	5	4.7	23.7	-1.5	25.2	38.7	46.6	90.7
				2	17.3	74.2	75.4	-1.1	-9.8	19.3	-3.6	22.9	40.2	51.1	90
				2	8.7	85.4	77.6	7.8	6.2	16.1	-3.5	19.6	28.3	54.8	91.3
				2	14.6	80.1	72	8.2	0.2	30.2	3.6	26.6	41.2	55.7	92
				2	11.2	83.7	79	4.7	-2.7	25.9	2	23.8	35	50.8	88.9
				2	13.8	81.9	76.3	5.7	5.3	21.5	0.6	20.9	34.7	49	96.8
				2	2.7	91.2	87	4.2	-2.4	14.7	-6.8	21.6	24.3	57.5	95.9
				2	10.5	82.7	77.6	5.2	5	20.2	0.6	19.6	30.1	57.5	92.4
				2	11.8	82.4	78	4.4	2.9	13.5	-2.2	15.7	27.4	54.6	96.4
				2	7	76.4	80.6	-4.2	-7.4	31	1.7	29.3	36.2	50.7	83.5
				2	2.5	83.5	84.5	-1	-6.6	11.9	-10.5	22.4	25	50.9	94.4
				2	9.6	84.5	77.8	6.8	3.2	19	0.2	18.8	28.4	53.4	93.1
				2	7.7	86	79.7	6.3	3.4	23.3	-0.9	24.2	31.9	56.7	91.4
				2	9.4	83	82	1.1	-6.7	17.7	-2.5	20.2	29.6	54.9	92.9
				2	17.4	76	79.1	-3.1	-12.2	23.6	6.8	16.9	34.2	53.8	82.1
				2	4.8	87.3	81	6.3	1.9	18.6	-1.4	20	24.8	60.2	97.6
				2	9.8	82.4	73.8	8.7	6.1	32.4	2.5	29.8	39.6	49.5	89.3
				2	9.4	85.8	81.9	3.9	0	21.8	4.8	17	26.4	49.2	91.9
				2	9.8	84.1	79	5	-0.2	23.6	6.1	17.5	27.3	52.6	91.5
				2	12.7	80.9	77	3.8	-0.8	20.3	1	19.2	31.9	45.6	91.3
				2	14.6	77.2	75.7	1.5	-5	22.8	6.2	16.6	31.2	52.8	84.9
				2	15.1	79.3	80.2	-0.9	-8.1	23	2	21	36.1	48.4	88
				2	14.2	80.5	74.6	5.9	-1.1	21.1	2.4	18.7	32.9	54.2	93.2
				2	9.5	84	85.1	-1.1	-9.1	29.9	4	25.9	35.4	47.3	92.8
				2	9.3	77.5	79.7	-2.2	-6.9	20.1	0.2	19.9	29.2	51.7	86.1
				2	4.4	87.5	87.8	-0.3	-2.6	14.8	-1	15.8	20.1	57.3	89.4
				2	18.7	70.3	71.4	-1.1	-12.5	40.6	6.4	34.2	52.9	42.8	79.1
				2	11.1	79.8	76.8	3	-0.6	24.9	9.6	15.3	26.4	53	91.5
				2	14.3	73.7	77.9	-4.2	-7.4	21.1	6.2	15	29.2	45.1	84.5
				2	12.3	81.2	84.2	-3	-15.4	31.4	3.7	27.7	40	53.8	94.4
				2	3.9	92.2	81.8	10.4	7.1	21.8	1.8	20	23.8	56.3	96.4
				2	16.9	81.5	77	4.5	-1	28.3	8.2	20	36.9	51.6	92.2
				2	13.2	82.1	78	4.1	2.3	21.4	4	17.4	30.6	51.4	89.8
				2	15.6	79	73.8	5.2	1.6	18.1	1.3	16.8	32.4	51.1	90.4
				2	7.7	89.4	82.8	6.6	-3.6	19.1	-0.6	19.8	27.5	54	94
				2	4.6	92	86.2	5.8	0	21.5	1.4	20.1	24.7	59.9	94.5
				2	13.1	78.8	79.2	-0.4	-7.8	33.5	6.1	27.4	40.5	45.6	88.9
				3	7.5	84.1	85	-0.9	-7.9	17.4	1	16.4	23.9	50.2	90.8
				3	17.2	82.8	74.5	8.3	4.2	19.4	5.9	13.6	30.8	55.7	89.4
				3	14.1	84.1	74.1	10	7.9	24.8	6.4	18.4	32.5	54	89.2
				3	15.2	79.8	77.9	1.9	-5.5	19.5	5.7	13.9	29	50.4	92.9
				3	12.5	80.2	75.1	5.1	-2.9	28.1	3.3	24.8	37.3	53.2	93.4
				3	13.4	80.8	73.3	7.5	0.8	33.2	1.9	31.3	44.7	51.6	90.5
				3	18.9	76	73.8	2.2	-3.9	22	6.6	15.5	34.3	51.6	91.2
				3	9.7	83.9	79.1	4.7	-1.4	29.3	0.5	28.8	38.5	49.6	89.9
				3	16.5	79.4	76.1	3.3	-2.4	26.3	6.5	19.8	36.3	50.7	88.9
				3	11.3	85.9	79.7	6.2	2.2	20.6	3.1	17.5	28.8	52.3	94.5
				3	9.9	79.5	76.1	3.4	0.4	21.9	1	20.9	30.8	50.8	86.5
				3	11.6	81.2	77.6	3.6	2	14.6	1.4	13.2	24.8	63.8	96
				3	12.9	83.7	78.4	5.3	-0.7	19.9	3.4	16.5	29.4	54.4	94.1
				3	14.6	76.2	79.6	-3.4	-7.4	17.7	6.9	10.8	25.4	46.6	88.1
				3	10.4	81.8	82.4	-0.6	-6.5	28.9	0.7	28.3	38.7	50.9	91.8
				3	16.2	80.6	77.7	3	-3.6	25.8	1.3	24.5	40.7	54.3	93.2
				3	8.3	80.6	82.2	-1.6	-12.2	23.4	0	23.4	31.7	53.7	89.2
				3	11.4	83.6	78.3	5.3	4.9	9.1	2.8	6.2	17.6	56.6	90.3
				3	7.9	86.4	80.3	6.1	5.8	20.8	0.6	20.2	28.1	49	90.1
				3	6.6	86.8	80.8	5.9	-0.6	12	-1.9	13.8	20.4	51.9	93.3
				3	15.3	84.3	91.1	-6.8	-26.4	27.2	5.9	21.2	36.6	48.6	92.8
				3	21.6	78.4	71.3	7	5.9	30.8	12.9	17.9	39.5	58.1	93.2
				3	8.7	86.5	79.7	6.8	3.8	20.8	0.6	20.2	28.9	55.8	93.9
				3	9.8	78.4	80.8	-2.4	-12.8	19.5	-1.9	21.4	31.1	48.9	87.1
				3	11.1	79.6	76	3.6	-0.7	20.4	1.8	18.6	29.7	50.1	90.3
				3	18.6	82.1	76	6.1	-1.1	37.4	13.5	23.9	42.6	50	92.9
				3	14.2	84.6	76.3	8.3	4.5	32.9	8.7	24.1	38.3	56.1	89.9
				3	4.8	84.9	90.4	-5.6	-6.3	15.9	-0.6	16.5	21.3	54.9	89.5
				3	11.1	80.9	79.6	1.3	-2.2	10.2	-0.3	10.6	21.7	49.3	90.1
				3	8.2	84.5	82.9	1.7	-2.2	15	1.1	13.9	22.1	48.1	94.5
				3	11.4	82.8	77.7	5.1	8.5	23.3	4.6	18.7	30.1	55.9	93.6
				3	13.4	85	79.1	5.9	-5.1	21.1	0.2	20.9	34.3	51.9	93.1
				3	13.6	84.3	79.1	5.2	6.1	11.1	5.4	5.7	19.3	59.9	93.1
				3	9	85.3	82.2	3.1	-3.8	30.2	6.7	23.6	32.6	51.3	94
				3	16.9	81.3	75.3	6	-3	33.5	10.1	23.4	40.3	49.3	88.5
				3	5.8	87.1	79.6	7.5	3.4	24	4	20	25.8	55.4	95.2
				3	10.6	82.9	78.5	4.5	-1.1	19	3.1	15.9	26.5	49.7	89.4
				3	12.2	80.5	81.5	-1	-5.8	26.4	7.9	18.5	30.7	49.4	87.6
				3	10.4	83.4	83.9	-0.4	-4.2	21.1	3	18.1	28.5	64.1	96.4
				3	4.3	89.8	87.9	1.9	-5.1	15.4	-0.2	15.6	20	52.9	90.9
				3	8.4	86.8	81.8	5	-2.5	18.5	0.7	17.8	26.2	47.4	93.8
				3	8.5	83.3	82.9	0.4	-6.9	21.8	0.2	21.6	30.1	58.1	90
				3	14.1	83.7	77.5	6.2	5.8	20.3	5.4	15	29.1	55.5	96.7
				3	13.1	82.7	78.9	3.8	-1.2	19.4	5.3	14.2	27.3	58.7	92.9
				3	6.1	85.6	85.7	-0.2	-21.4	34	-2.7	36.7	42.8	55	94.4
				3	10.8	87	75.9	11.1	3.4	25.6	-1.6	27.2	37.9	53.9	92.7
				3	15.2	78	82.4	-4.4	-12.6	20.5	6.2	14.2	29.5	58.2	85.6
				3	10.1	84.1	80.4	3.7	-4.7	24.2	0.3	23.8	33.9	50.1	94.7
				3	11.5	79.8	77.5	2.2	-0.3	18.7	4.7	14.1	25.6	53	87.4
				3	14.1	83.1	78.7	4.4	-1.7	19.2	0.1	19.1	33.2	57.3	96.5
				3	8	87.5	85.1	2.4	1.8	-3	0.3	-3.4	4.6	62.3	98
				3	11.1	84.1	80.2	3.9	-1	18.1	-1.3	19.4	30.5	52.8	91.1
				3	13.7	83	78.7	4.3	2.4	25.1	5.9	19.2	32.8	58.4	91.9
				3	9	85.3	85.6	-0.2	-6.1	18.2	-1	19.2	28.1	49.8	95.7
				3	8.5	82.7	83.3	-0.5	-8.3	16.4	3.7	12.7	21.2	51.2	91.7
				3	17.5	84.5	84.3	0.1	-5.8	19.9	9.5	10.4	27.9	49	92.6
				3	2.9	90.3	87.7	2.6	-2.1	13.1	-3.6	16.7	19.5	52.4	95
				3	13.4	84.3	81.7	2.6	-1.3	18.4	1.7	16.8	30.2	52	93.4
				3	9.1	85.4	83.2	2.2	-5.5	25.4	1.7	23.6	32.7	52.3	92
				3	6.9	88.2	87	1.2	-2.7	15.9	-2.2	18.2	25	46.6	95.8
				3	13.2	79.4	79.9	-0.5	-7	28.8	1.1	27.8	41	48.6	86.1
				3	16.7	79.9	72.2	7.7	5.4	31.1	6.4	24.7	41.4	47.7	87.3
				4	18.9	76.6	77.4	-0.7	-7.2	28.3	7.3	21.1	40	46.7	89.6
				4	9.7	85.8	81.6	4.2	-6	24	1.2	22.8	32.5	56.7	99.8
				4	18.8	76.3	72	4.3	-2.3	27.8	4.8	23	41.8	49.6	93.6
				4	9.5	82.4	86.6	-4.2	-11.4	16.1	1.8	14.3	23.7	47.5	89.8
				4	4.5	87.7	79.1	8.6	6.3	31.3	6.6	24.7	29.2	54	91.8
				4	10.3	85.2	87.8	-2.7	-11.6	21.6	0.7	20.9	31.2	49.8	89.7
				4	12.6	81.4	77.6	3.8	-1.1	31.4	6.1	25.3	37.8	55.2	94.5
				4	1.4	92.9	85.7	7.2	-5.6	31.9	-2	33.9	35.3	55.2	98.7
				4	7.3	82.9	84.3	-1.4	-5.9	9.8	-3	12.8	20.1	53.8	91.4
				4	13.3	83.5	75	8.4	1	17.9	-3.1	21	34.3	48.4	92.8
				4	17	82.5	75	7.5	9.4	12	3.9	8.1	25.2	54.6	93.8
				4	12.3	87.5	81.2	6.2	6.8	11.8	3.8	7.9	20.2	61.1	99.1
				4	14.8	82.1	75.1	6.9	2.9	21	1.6	19.4	34.2	45.8	91.5
				4	19.3	83.2	79	4.2	-4.2	23.6	9.4	14.2	33.5	49.6	96.3
				4	14.4	84.9	79.3	5.6	0.2	20.1	7.9	12.2	26.6	53.9	89.2
				4	17	81.1	76.1	5	3.8	14.4	6.9	7.6	24.6	52	91.3
				4	10.4	87.1	90.1	-3	-8.7	16.8	6.3	10.5	20.8	53.7	91.5
				4	18.4	76.9	74.2	2.7	4.5	21	5.5	15.5	33.8	53.6	86.9
				4	20.6	85.4	77.4	8	5	24.3	7.9	16.4	37	50.3	98.9
				4	15.3	84.3	91.1	-6.8	-26.4	27.2	5.9	21.2	36.6	48.6	92.8
				4	17.4	81.6	77.9	3.7	-5.6	28.6	6.8	21.8	39.1	52.1	94.2
				4	5.4	92.8	87.7	5.1	0.3	13.1	1.7	11.4	16.8	61.7	96
				4	13.3	86.3	80.9	5.4	1.1	17.4	4.1	13.3	26.6	51.3	86
				4	9.2	90.1	85.1	5	0.7	14	1.1	12.9	22.1	61	100.3
				4	16.6	87.5	80.9	6.6	0.9	15.4	7.8	7.7	24.3	54.8	98.3
				4	20.4	83	75.3	7.7	3.4	14.8	10.9	3.9	24.3	54.6	93.1
				4	15.3	87.3	80.7	6.7	2.2	18.1	5.6	12.5	27.8	51.5	92.6
				4	16	87.9	81.6	6.3	-1	32.3	12.5	19.8	35.7	47.9	98.9

## Sheet: NJSN
Full NJ/SN* 100 ˂0.73			4	Groups	SN/H	SNA	SNB	ANB	AoBo	PP/MP	PP/H	MP/H	SN/MP	ANS-PNS	maxillary depth
n=24				4	16	87.9	81.6	6.3	-1	32.3	12.5	19.8	35.7	47.9	98.9
mean =	6.41±5.68			4	15.3	87.3	80.7	6.7	2.2	18.1	5.6	12.5	27.8	51.5	92.6
Normal toward Full 0.73˂SJ/SN x 100 ˂6.41			3	4	20.6	85.4	77.4	8	5	24.3	7.9	16.4	37	50.3	98.9
n= 70				4	13.3	86.3	80.9	5.4	1.1	17.4	4.1	13.3	26.6	51.3	86
				4	20.4	83	75.3	7.7	3.4	14.8	10.9	3.9	24.3	54.6	93.1
Normal toward Flat 6.41˂SJ/SN x 100 ˂12.09			2	4	16.6	87.5	80.9	6.6	0.9	15.4	7.8	7.7	24.3	54.8	98.3
n= 60				4	17	82.5	75	7.5	9.4	12	3.9	8.1	25.2	54.6	93.8
				4	12.3	87.5	81.2	6.2	6.8	11.8	3.8	7.9	20.2	61.1	99.1
Flat NJ/SN* 100 ˃ 12.09			1	4	21.6	78.4	71.3	7	5.9	30.8	12.9	17.9	39.5	58.1	93.2
n= 29				4	9.2	90.1	85.1	5	0.7	14	1.1	12.9	22.1	61	100.3
				4	13.4	84.3	81.7	2.6	-1.3	18.4	1.7	16.8	30.2	52	93.4
				4	4.6	92	86.2	5.8	0	21.5	1.4	20.1	24.7	59.9	94.5
				4	17.5	84.5	84.3	0.1	-5.8	19.9	9.5	10.4	27.9	49	92.6
				4	5.4	92.8	87.7	5.1	0.3	13.1	1.7	11.4	16.8	61.7	96
				4	14.4	84.9	79.3	5.6	0.2	20.1	7.9	12.2	26.6	53.9	89.2
				4	18.6	82.1	76	6.1	-1.1	37.4	13.5	23.9	42.6	50	92.9
				4	13.4	85	79.1	5.9	-5.1	21.1	0.2	20.9	34.3	51.9	93.1
				4	19.3	83.2	79	4.2	-4.2	23.6	9.4	14.2	33.5	49.6	96.3
				4	15.3	84.3	91.1	-6.8	-26.4	27.2	5.9	21.2	36.6	48.6	92.8
				4	18.4	76.9	74.2	2.7	4.5	21	5.5	15.5	33.8	53.6	86.9
				4	7.7	89.4	82.8	6.6	-3.6	19.1	-0.6	19.8	27.5	54	94
				4	17.2	82.8	74.5	8.3	4.2	19.4	5.9	13.6	30.8	55.7	89.4
				4	10.4	87.1	90.1	-3	-8.7	16.8	6.3	10.5	20.8	53.7	91.5
				4	14.8	82.1	75.1	6.9	2.9	21	1.6	19.4	34.2	45.8	91.5
				3	16.9	81.5	77	4.5	-1	28.3	8.2	20	36.9	51.6	92.2
				3	14.1	84.1	74.1	10	7.9	24.8	6.4	18.4	32.5	54	89.2
				3	16.9	81.3	75.3	6	-3	33.5	10.1	23.4	40.3	49.3	88.5
				3	17	81.1	76.1	5	3.8	14.4	6.9	7.6	24.6	52	91.3
				3	14.2	84.6	76.3	8.3	4.5	32.9	8.7	24.1	38.3	56.1	89.9
				3	14.1	83.1	78.7	4.4	-1.7	19.2	0.1	19.1	33.2	57.3	96.5
				3	14.1	83.7	77.5	6.2	5.8	20.3	5.4	15	29.1	55.5	96.7
				3	18.9	76.6	77.4	-0.7	-7.2	28.3	7.3	21.1	40	46.7	89.6
				3	16.5	79.4	76.1	3.3	-2.4	26.3	6.5	19.8	36.3	50.7	88.9
				3	14.2	80.5	74.6	5.9	-1.1	21.1	2.4	18.7	32.9	54.2	93.2
				3	15.3	84.3	91.1	-6.8	-26.4	27.2	5.9	21.2	36.6	48.6	92.8
				3	13.3	83.5	75	8.4	1	17.9	-3.1	21	34.3	48.4	92.8
				3	6.9	88.2	87	1.2	-2.7	15.9	-2.2	18.2	25	46.6	95.8
				3	16.2	80.6	77.7	3	-3.6	25.8	1.3	24.5	40.7	54.3	93.2
				3	1.4	92.9	85.7	7.2	-5.6	31.9	-2	33.9	35.3	55.2	98.7
				3	9.1	85.4	83.2	2.2	-5.5	25.4	1.7	23.6	32.7	52.3	92
				3	13.7	83	78.7	4.3	2.4	25.1	5.9	19.2	32.8	58.4	91.9
				3	9.7	85.8	81.6	4.2	-6	24	1.2	22.8	32.5	56.7	99.8
				3	18.9	76	73.8	2.2	-3.9	22	6.6	15.5	34.3	51.6	91.2
				3	8	87.5	85.1	2.4	1.8	-3	0.3	-3.4	4.6	62.3	98
				3	11.1	84.1	80.2	3.9	-1	18.1	-1.3	19.4	30.5	52.8	91.1
				3	18.8	76.3	72	4.3	-2.3	27.8	4.8	23	41.8	49.6	93.6
				3	11.3	85.9	79.7	6.2	2.2	20.6	3.1	17.5	28.8	52.3	94.5
				3	16.7	79.9	72.2	7.7	5.4	31.1	6.4	24.7	41.4	47.7	87.3
				3	10.8	87	75.9	11.1	3.4	25.6	-1.6	27.2	37.9	53.9	92.7
				3	13.6	84.3	79.1	5.2	6.1	11.1	5.4	5.7	19.3	59.9	93.1
				3	10.4	83.4	83.9	-0.4	-4.2	21.1	3	18.1	28.5	64.1	96.4
				3	17.4	81.6	77.9	3.7	-5.6	28.6	6.8	21.8	39.1	52.1	94.2
				3	10.1	84.1	80.4	3.7	-4.7	24.2	0.3	23.8	33.9	50.1	94.7
				3	13.2	79.4	79.9	-0.5	-7	28.8	1.1	27.8	41	48.6	86.1
				3	12.9	83.7	78.4	5.3	-0.7	19.9	3.4	16.5	29.4	54.4	94.1
				3	13.4	80.8	73.3	7.5	0.8	33.2	1.9	31.3	44.7	51.6	90.5
				3	11.1	84.8	83.5	1.3	-4.3	34	12	22	33.1	58.6	95.1
				3	8.7	86.5	79.7	6.8	3.8	20.8	0.6	20.2	28.9	55.8	93.9
				3	15.2	79.8	77.9	1.9	-5.5	19.5	5.7	13.9	29	50.4	92.9
				3	11.4	83.6	78.3	5.3	4.9	9.1	2.8	6.2	17.6	56.6	90.3
				3	9	85.3	82.2	3.1	-3.8	30.2	6.7	23.6	32.6	51.3	94
				3	10.3	85.2	87.8	-2.7	-11.6	21.6	0.7	20.9	31.2	49.8	89.7
				3	8.4	86.8	81.8	5	-2.5	18.5	0.7	17.8	26.2	47.4	93.8
				3	13.1	82.7	78.9	3.8	-1.2	19.4	5.3	14.2	27.3	58.7	92.9
				3	6.6	86.8	80.8	5.9	-0.6	12	-1.9	13.8	20.4	51.9	93.3
				3	2.7	91.2	87	4.2	-2.4	14.7	-6.8	21.6	24.3	57.5	95.9
				3	9	85.3	85.6	-0.2	-6.1	18.2	-1	19.2	28.1	49.8	95.7
				3	8.5	83.3	82.9	0.4	-6.9	21.8	0.2	21.6	30.1	58.1	90
				3	10.5	82.7	77.6	5.2	5	20.2	0.6	19.6	30.1	57.5	92.4
				3	15.6	79	73.8	5.2	1.6	18.1	1.3	16.8	32.4	51.1	90.4
				3	9.5	84	85.1	-1.1	-9.1	29.9	4	25.9	35.4	47.3	92.8
				3	11.8	82.4	78	4.4	2.9	13.5	-2.2	15.7	27.4	54.6	96.4
				3	8.7	85.4	77.6	7.8	6.2	16.1	-3.5	19.6	28.3	54.8	91.3
				3	11.2	83.7	79	4.7	-2.7	25.9	2	23.8	35	50.8	88.9
				3	17	75.8	70.7	5.1	4.8	29.7	6.4	23.2	40.2	51.9	85.6
				3	16.4	77.4	72.9	4.5	-3.4	27.9	5.1	22.8	39.2	51.2	88.6
				3	13.8	81.9	76.3	5.7	5.3	21.5	0.6	20.9	34.7	49	96.8
				3	11.6	81.2	77.6	3.6	2	14.6	1.4	13.2	24.8	63.8	96
				3	12.5	80.2	75.1	5.1	-2.9	28.1	3.3	24.8	37.3	53.2	93.4
				3	12.2	80.5	81.5	-1	-5.8	26.4	7.9	18.5	30.7	49.4	87.6
				3	12.3	81.2	84.2	-3	-15.4	31.4	3.7	27.7	40	53.8	94.4
				3	7.9	86.4	80.3	6.1	5.8	20.8	0.6	20.2	28.1	49	90.1
				3	10.6	82.9	78.5	4.5	-1.1	19	3.1	15.9	26.5	49.7	89.4
				3	6	87.2	80.7	6.5	3.3	20.2	0.2	20	26.1	53.7	88.3
				3	9.4	85.8	81.9	3.9	0	21.8	4.8	17	26.4	49.2	91.9
				3	13.2	82.1	78	4.1	2.3	21.4	4	17.4	30.6	51.4	89.8
				3	4.5	87.7	79.1	8.6	6.3	31.3	6.6	24.7	29.2	54	91.8
				3	10.4	81.8	82.4	-0.6	-6.5	28.9	0.7	28.3	38.7	50.9	91.8
				3	9.6	84.5	77.8	6.8	3.2	19	0.2	18.8	28.4	53.4	93.1
				3	13.1	84.2	79.9	4.3	3.2	23	5.6	17.4	30.5	64.1	91.6
				3	13.5	80.8	75.8	5	4.7	23.7	-1.5	25.2	38.7	46.6	90.7
				3	3.9	92.2	81.8	10.4	7.1	21.8	1.8	20	23.8	56.3	96.4
				3	7.3	84.2	81.8	2.4	-2.4	20.5	-1.4	21.8	29.2	58.4	97.6
				3	15.9	80.2	82.1	-1.9	-9.9	26.9	9.8	17.2	33	57.8	91.5
				2	13.1	78.8	79.2	-0.4	-7.8	33.5	6.1	27.4	40.5	45.6	88.9
				2	12.6	81.4	77.6	3.8	-1.1	31.4	6.1	25.3	37.8	55.2	94.5
				2	8.2	84.5	82.9	1.7	-2.2	15	1.1	13.9	22.1	48.1	94.5
				2	15.1	79.3	80.2	-0.9	-8.1	23	2	21	36.1	48.4	88
				2	4.3	89.8	87.9	1.9	-5.1	15.4	-0.2	15.6	20	52.9	90.9
				2	11.1	80.9	79.6	1.3	-2.2	10.2	-0.3	10.6	21.7	49.3	90.1
				2	4.4	87.5	87.8	-0.3	-2.6	14.8	-1	15.8	20.1	57.3	89.4
				2	9.7	83.9	79.1	4.7	-1.4	29.3	0.5	28.8	38.5	49.6	89.9
				2	15.2	78	82.4	-4.4	-12.6	20.5	6.2	14.2	29.5	58.2	85.6
				2	11.1	79.6	76	3.6	-0.7	20.4	1.8	18.6	29.7	50.1	90.3
				2	7.3	82.9	84.3	-1.4	-5.9	9.8	-3	12.8	20.1	53.8	91.4
				2	17.4	76	79.1	-3.1	-12.2	23.6	6.8	16.9	34.2	53.8	82.1
				2	12.8	77.5	84	-6.5	-17	15.2	6.6	8.6	21.4	55.9	89.5
				2	4.8	84.9	90.4	-5.6	-6.3	15.9	-0.6	16.5	21.3	54.9	89.5
				2	9.8	84.1	79	5	-0.2	23.6	6.1	17.5	27.3	52.6	91.5
				2	14.6	77.2	75.7	1.5	-5	22.8	6.2	16.6	31.2	52.8	84.9
				2	17.3	74.2	75.4	-1.1	-9.8	19.3	-3.6	22.9	40.2	51.1	90
				2	2.9	90.3	87.7	2.6	-2.1	13.1	-3.6	16.7	19.5	52.4	95
				2	9.8	82.4	73.8	8.7	6.1	32.4	2.5	29.8	39.6	49.5	89.3
				2	14.6	80.1	72	8.2	0.2	30.2	3.6	26.6	41.2	55.7	92
				2	9.5	82.4	86.6	-4.2	-11.4	16.1	1.8	14.3	23.7	47.5	89.8
				2	7.7	86	79.7	6.3	3.4	23.3	-0.9	24.2	31.9	56.7	91.4
				2	11.4	82.8	77.7	5.1	8.5	23.3	4.6	18.7	30.1	55.9	93.6
				2	12.7	80.9	77	3.8	-0.8	20.3	1	19.2	31.9	45.6	91.3
				2	9.4	83	82	1.1	-6.7	17.7	-2.5	20.2	29.6	54.9	92.9
				2	7.5	84.1	85	-0.9	-7.9	17.4	1	16.4	23.9	50.2	90.8
				2	18.7	70.3	71.4	-1.1	-12.5	40.6	6.4	34.2	52.9	42.8	79.1
				2	6.1	85.6	85.7	-0.2	-21.4	34	-2.7	36.7	42.8	55	94.4
				2	14.6	76.2	79.6	-3.4	-7.4	17.7	6.9	10.8	25.4	46.6	88.1
				2	5.8	87.1	79.6	7.5	3.4	24	4	20	25.8	55.4	95.2
				2	11.4	78.3	80.6	-2.3	-6.7	20.6	2.3	18.3	29.7	52.2	88.3
				2	9.2	82.7	77.5	5.2	-0.2	34.6	2.2	32.4	41.5	44.8	95.3
				2	4.8	87.3	81	6.3	1.9	18.6	-1.4	20	24.8	60.2	97.6
				2	13.6	80.9	72.2	8.7	3.7	30	10.8	19.2	32.8	52.3	88.9
				2	18	72	74.8	-2.8	-9.3	26.3	4.7	21.6	39.6	54.1	88.2
				2	11.5	79.8	77.5	2.2	-0.3	18.7	4.7	14.1	25.6	53	87.4
				2	9.8	78.4	80.8	-2.4	-12.8	19.5	-1.9	21.4	31.1	48.9	87.1
				2	8.4	83.5	79.4	4.1	-1.4	13.2	-1.8	15	23.4	55.8	92.2
				2	13	76.7	73.6	3.1	3.4	22.3	1	21.3	34.4	52.2	84
				2	8.4	82.8	76.3	6.5	3.9	17.6	-1.2	18.8	27.3	56.4	94.6
				2	9.7	78.9	77.9	0.9	-3.2	11.4	-8.8	20.1	29.8	52.5	87.8
				2	17.3	72.5	72.8	-0.3	-2.7	20.9	6.9	14	31.3	48.3	83
				2	11.1	79.8	76.8	3	-0.6	24.9	9.6	15.3	26.4	53	91.5
				2	9.9	79.5	76.1	3.4	0.4	21.9	1	20.9	30.8	50.8	86.5
				2	5.6	84.5	90.9	-6.4	-11.8	16	-1.1	17.1	22.7	55.5	90.4
				2	6.8	83.8	79.4	4.4	4.9	5.1	-5.5	10.5	17.3	60	94.2
				2	8.7	81	75.9	5.1	0.4	30.9	-2	32.9	41.6	51.6	90.7
				2	14.8	78.9	74	4.9	5.9	19.9	7.3	12.6	27.4	50.6	90.3
				2	10.2	79.2	78.8	0.4	-5.5	26	1	25	35.2	56.4	90.8
				2	11.8	79.1	69.2	9.9	1.6	26.2	-1.1	27.3	39.1	47.4	92.4
				2	12.9	75.4	70.6	4.8	6.1	17.3	-5	22.3	35.3	60.7	89.6
				2	14.4	74.2	71.4	2.8	5.1	19.5	7	12.5	26.9	49	87.8
				2	14.3	73.7	77.9	-4.2	-7.4	21.1	6.2	15	29.2	45.1	84.5
				2	8.3	80.6	82.2	-1.6	-12.2	23.4	0	23.4	31.7	53.7	89.2
				2	6.7	83	78.1	5	1	19.9	-0.2	20.1	26.8	55.7	90.3
				2	14.5	70.7	74.2	-3.5	-14.5	35.6	7	28.5	43	51.4	85.2
				2	8.5	82.7	83.3	-0.5	-8.3	16.4	3.7	12.7	21.2	51.2	91.7
				2	10.8	72.9	70	2.8	3.7	20	-3	22.9	33.7	53.6	84.8
				2	9.9	79.8	78.7	1.1	1.3	13.5	0.9	12.5	22.4	58.1	88.2
				2	1.8	86	82.7	3.3	-1.7	21.7	-3.2	24.9	26.6	52.3	94.9
				1	9.3	77.5	79.7	-2.2	-6.9	20.1	0.2	19.9	29.2	51.7	86.1
				1	9.3	79.6	79.6	0	-4.9	27.5	-0.9	28.4	37.7	58.9	91.4
				1	3.4	86	87.2	-1.2	-4.8	26	-1.3	27.3	30.7	53.5	92.9
				1	8.2	81.8	95	-13.2	-19	11	0.8	10.1	18.4	61.4	85.6
				1	1.3	85.5	86.3	-0.8	-2.3	12	-7.3	19.3	20.6	55.9	90
				1	0.4	84.5	85.2	-0.7	2.1	10.6	-1.4	11.9	12.3	63.5	92.5
				1	7.9	81.9	81.5	0.3	-6.8	21.7	-3	24.7	32.7	53	92.3
				1	6.7	80.6	82.8	-2.2	-6.9	22.9	2.4	20.4	27.2	58.3	88.8
				1	6.2	80	84.6	-4.7	-15.2	17.9	-4	21.9	28.1	54.2	90.2
				1	6.6	80.1	80	0	-6.7	11.5	-7	18.5	25.2	51.4	87.8
				1	6.6	81.5	78.1	3.4	3.1	11.6	-3.5	15.1	21.7	55.6	85.9
				1	10	75.9	77.7	-1.8	-6.3	14.6	-1	15.7	25.7	51.1	87.5
				1	8.1	75.9	73.2	2.7	7.7	19.3	0.9	18.3	26.4	56.4	87.5
				1	2.5	83.5	84.5	-1	-6.6	11.9	-10.5	22.4	25	50.9	94.4
				1	9.7	73.6	80.1	-6.6	-18.6	33.2	-3.1	36.3	46.1	58.9	86.7
				1	9	76.8	79.4	-2.6	-6.6	23.3	1.1	22.3	31.3	47.8	87.1
				1	6.3	80.2	77.2	3	3.4	14.3	-1.5	15.8	22.1	55.7	90.1
				1	7	76.4	80.6	-4.2	-7.4	31	1.7	29.3	36.2	50.7	83.5
				1	6.7	77.5	80.7	-3.2	-0.3	25	-1.1	26.1	32.8	52.4	87.4
				1	1.8	84.5	87.7	-3.2	-11.3	18.2	-5.8	23.9	25.7	53.7	95.4
				1	0.9	82.2	84.4	-2.2	-6.6	15.6	-7.2	22.7	23.7	56.6	89.8
				1	13.3	68.9	74.2	-5.3	-13.8	35.4	7	28.4	41.7	50.8	79.6
				1	4.7	79.4	83.4	-4	-7.6	17.1	-3.9	21	25.7	55.3	84.5
				1	5.4	79.8	78.9	0.9	-3.8	22.8	-6.6	29.4	34.8	54.1	91.1
				1	0.9	83	82.3	0.7	-0.4	15.5	-8.1	23.5	24.5	57	90.3
				1	4.7	78.4	84.2	-5.9	-6.9	28	1.7	26.3	31	47.6	90.3
				1	3.8	78.5	85.9	-7.5	-16.5	24.6	-1.6	26.2	29.9	52.8	88.9
				1	0.2	82.4	88.5	-6.1	-7.9	13	-5.3	18.3	18.6	53.9	88
				1	2.7	74.4	78.1	-3.8	-1.2	18.3	-6.3	24.5	27.2	52	83.3

## Sheet: NGSN
Full NG/SN* 100 ˂40.23			4	Groups	SN/H	SNA	SNB	ANB	AoBo	PP/MP	PP/H	MP/H	SN/MP	ANS-PNS	maxillary depth
n=23				4	16	87.9	81.6	6.3	-1	32.3	12.5	19.8	35.7	47.9	98.9
mean =	44.41±4.18			4	13.3	86.3	80.9	5.4	1.1	17.4	4.1	13.3	26.6	51.3	86
Normal toward Full 40.23 ˂SG/SN x 100 ˂44.41			3	4	20.6	85.4	77.4	8	5	24.3	7.9	16.4	37	50.3	98.9
n= 74				4	16.6	87.5	80.9	6.6	0.9	15.4	7.8	7.7	24.3	54.8	98.3
				4	15.3	87.3	80.7	6.7	2.2	18.1	5.6	12.5	27.8	51.5	92.6
Normal toward Flat 44.41˂SG/SN x 100 ˂48.59			2	4	18.4	76.9	74.2	2.7	4.5	21	5.5	15.5	33.8	53.6	86.9
n= 60				4	20.4	83	75.3	7.7	3.4	14.8	10.9	3.9	24.3	54.6	93.1
				4	17	81.1	76.1	5	3.8	14.4	6.9	7.6	24.6	52	91.3
Flat NG/SN* 100 ˃48.59			1	4	15.3	84.3	91.1	-6.8	-26.4	27.2	5.9	21.2	36.6	48.6	92.8
n=26				4	5.4	92.8	87.7	5.1	0.3	13.1	1.7	11.4	16.8	61.7	96
				4	9.2	90.1	85.1	5	0.7	14	1.1	12.9	22.1	61	100.3
				4	12.3	87.5	81.2	6.2	6.8	11.8	3.8	7.9	20.2	61.1	99.1
				4	18.9	76.6	77.4	-0.7	-7.2	28.3	7.3	21.1	40	46.7	89.6
				4	18.8	76.3	72	4.3	-2.3	27.8	4.8	23	41.8	49.6	93.6
				4	17	82.5	75	7.5	9.4	12	3.9	8.1	25.2	54.6	93.8
				4	10.4	87.1	90.1	-3	-8.7	16.8	6.3	10.5	20.8	53.7	91.5
				4	21.6	78.4	71.3	7	5.9	30.8	12.9	17.9	39.5	58.1	93.2
				4	14.4	84.9	79.3	5.6	0.2	20.1	7.9	12.2	26.6	53.9	89.2
				4	14.8	82.1	75.1	6.9	2.9	21	1.6	19.4	34.2	45.8	91.5
				4	13.4	84.3	81.7	2.6	-1.3	18.4	1.7	16.8	30.2	52	93.4
				4	16.7	79.9	72.2	7.7	5.4	31.1	6.4	24.7	41.4	47.7	87.3
				4	17.5	84.5	84.3	0.1	-5.8	19.9	9.5	10.4	27.9	49	92.6
				4	18.6	82.1	76	6.1	-1.1	37.4	13.5	23.9	42.6	50	92.9
				3	12.6	81.4	77.6	3.8	-1.1	31.4	6.1	25.3	37.8	55.2	94.5
				3	16.9	81.3	75.3	6	-3	33.5	10.1	23.4	40.3	49.3	88.5
				3	19.3	83.2	79	4.2	-4.2	23.6	9.4	14.2	33.5	49.6	96.3
				3	17.4	81.6	77.9	3.7	-5.6	28.6	6.8	21.8	39.1	52.1	94.2
				3	13.2	79.4	79.9	-0.5	-7	28.8	1.1	27.8	41	48.6	86.1
				3	18.9	76	73.8	2.2	-3.9	22	6.6	15.5	34.3	51.6	91.2
				3	15.2	78	82.4	-4.4	-12.6	20.5	6.2	14.2	29.5	58.2	85.6
				3	13.7	83	78.7	4.3	2.4	25.1	5.9	19.2	32.8	58.4	91.9
				3	14.1	83.1	78.7	4.4	-1.7	19.2	0.1	19.1	33.2	57.3	96.5
				3	10.3	85.2	87.8	-2.7	-11.6	21.6	0.7	20.9	31.2	49.8	89.7
				3	18.7	70.3	71.4	-1.1	-12.5	40.6	6.4	34.2	52.9	42.8	79.1
				3	9.5	82.4	86.6	-4.2	-11.4	16.1	1.8	14.3	23.7	47.5	89.8
				3	9.7	85.8	81.6	4.2	-6	24	1.2	22.8	32.5	56.7	99.8
				3	13.3	83.5	75	8.4	1	17.9	-3.1	21	34.3	48.4	92.8
				3	7.3	82.9	84.3	-1.4	-5.9	9.8	-3	12.8	20.1	53.8	91.4
				3	16.2	80.6	77.7	3	-3.6	25.8	1.3	24.5	40.7	54.3	93.2
				3	1.4	92.9	85.7	7.2	-5.6	31.9	-2	33.9	35.3	55.2	98.7
				3	16.5	79.4	76.1	3.3	-2.4	26.3	6.5	19.8	36.3	50.7	88.9
				3	4.6	92	86.2	5.8	0	21.5	1.4	20.1	24.7	59.9	94.5
				3	11.5	79.8	77.5	2.2	-0.3	18.7	4.7	14.1	25.6	53	87.4
				3	11.1	84.1	80.2	3.9	-1	18.1	-1.3	19.4	30.5	52.8	91.1
				3	9.1	85.4	83.2	2.2	-5.5	25.4	1.7	23.6	32.7	52.3	92
				3	13.1	82.7	78.9	3.8	-1.2	19.4	5.3	14.2	27.3	58.7	92.9
				3	14.2	84.6	76.3	8.3	4.5	32.9	8.7	24.1	38.3	56.1	89.9
				3	13.6	84.3	79.1	5.2	6.1	11.1	5.4	5.7	19.3	59.9	93.1
				3	16.9	81.5	77	4.5	-1	28.3	8.2	20	36.9	51.6	92.2
				3	9	85.3	85.6	-0.2	-6.1	18.2	-1	19.2	28.1	49.8	95.7
				3	4.5	87.7	79.1	8.6	6.3	31.3	6.6	24.7	29.2	54	91.8
				3	17.4	76	79.1	-3.1	-12.2	23.6	6.8	16.9	34.2	53.8	82.1
				3	12.2	80.5	81.5	-1	-5.8	26.4	7.9	18.5	30.7	49.4	87.6
				3	14.6	76.2	79.6	-3.4	-7.4	17.7	6.9	10.8	25.4	46.6	88.1
				3	8.5	82.7	83.3	-0.5	-8.3	16.4	3.7	12.7	21.2	51.2	91.7
				3	10.1	84.1	80.4	3.7	-4.7	24.2	0.3	23.8	33.9	50.1	94.7
				3	13.4	85	79.1	5.9	-5.1	21.1	0.2	20.9	34.3	51.9	93.1
				3	15.2	79.8	77.9	1.9	-5.5	19.5	5.7	13.9	29	50.4	92.9
				3	15.6	79	73.8	5.2	1.6	18.1	1.3	16.8	32.4	51.1	90.4
				3	6.9	88.2	87	1.2	-2.7	15.9	-2.2	18.2	25	46.6	95.8
				3	10.4	83.4	83.9	-0.4	-4.2	21.1	3	18.1	28.5	64.1	96.4
				3	10.6	82.9	78.5	4.5	-1.1	19	3.1	15.9	26.5	49.7	89.4
				3	14.1	83.7	77.5	6.2	5.8	20.3	5.4	15	29.1	55.5	96.7
				3	11.4	82.8	77.7	5.1	8.5	23.3	4.6	18.7	30.1	55.9	93.6
				3	8	87.5	85.1	2.4	1.8	-3	0.3	-3.4	4.6	62.3	98
				3	14.1	84.1	74.1	10	7.9	24.8	6.4	18.4	32.5	54	89.2
				3	11.1	80.9	79.6	1.3	-2.2	10.2	-0.3	10.6	21.7	49.3	90.1
				3	12.9	83.7	78.4	5.3	-0.7	19.9	3.4	16.5	29.4	54.4	94.1
				3	2.9	90.3	87.7	2.6	-2.1	13.1	-3.6	16.7	19.5	52.4	95
				3	13.4	80.8	73.3	7.5	0.8	33.2	1.9	31.3	44.7	51.6	90.5
				3	11.1	79.6	76	3.6	-0.7	20.4	1.8	18.6	29.7	50.1	90.3
				3	17.3	74.2	75.4	-1.1	-9.8	19.3	-3.6	22.9	40.2	51.1	90
				3	15.1	79.3	80.2	-0.9	-8.1	23	2	21	36.1	48.4	88
				3	7.7	89.4	82.8	6.6	-3.6	19.1	-0.6	19.8	27.5	54	94
				3	14.3	73.7	77.9	-4.2	-7.4	21.1	6.2	15	29.2	45.1	84.5
				3	8.4	86.8	81.8	5	-2.5	18.5	0.7	17.8	26.2	47.4	93.8
				3	15.3	84.3	91.1	-6.8	-26.4	27.2	5.9	21.2	36.6	48.6	92.8
				3	8.5	83.3	82.9	0.4	-6.9	21.8	0.2	21.6	30.1	58.1	90
				3	17.2	82.8	74.5	8.3	4.2	19.4	5.9	13.6	30.8	55.7	89.4
				3	11.4	83.6	78.3	5.3	4.9	9.1	2.8	6.2	17.6	56.6	90.3
				3	14.6	77.2	75.7	1.5	-5	22.8	6.2	16.6	31.2	52.8	84.9
				3	9	85.3	82.2	3.1	-3.8	30.2	6.7	23.6	32.6	51.3	94
				3	12.5	80.2	75.1	5.1	-2.9	28.1	3.3	24.8	37.3	53.2	93.4
				3	11.6	81.2	77.6	3.6	2	14.6	1.4	13.2	24.8	63.8	96
				3	13.1	78.8	79.2	-0.4	-7.8	33.5	6.1	27.4	40.5	45.6	88.9
				3	14.2	80.5	74.6	5.9	-1.1	21.1	2.4	18.7	32.9	54.2	93.2
				3	13.2	82.1	78	4.1	2.3	21.4	4	17.4	30.6	51.4	89.8
				3	6.1	85.6	85.7	-0.2	-21.4	34	-2.7	36.7	42.8	55	94.4
				3	9.8	78.4	80.8	-2.4	-12.8	19.5	-1.9	21.4	31.1	48.9	87.1
				3	8.2	84.5	82.9	1.7	-2.2	15	1.1	13.9	22.1	48.1	94.5
				3	16.4	77.4	72.9	4.5	-3.4	27.9	5.1	22.8	39.2	51.2	88.6
				3	11.3	85.9	79.7	6.2	2.2	20.6	3.1	17.5	28.8	52.3	94.5
				3	10.4	81.8	82.4	-0.6	-6.5	28.9	0.7	28.3	38.7	50.9	91.8
				3	10.8	87	75.9	11.1	3.4	25.6	-1.6	27.2	37.9	53.9	92.7
				3	8.7	86.5	79.7	6.8	3.8	20.8	0.6	20.2	28.9	55.8	93.9
				3	5.8	87.1	79.6	7.5	3.4	24	4	20	25.8	55.4	95.2
				3	12.3	81.2	84.2	-3	-15.4	31.4	3.7	27.7	40	53.8	94.4
				2	4.3	89.8	87.9	1.9	-5.1	15.4	-0.2	15.6	20	52.9	90.9
				2	9.9	79.5	76.1	3.4	0.4	21.9	1	20.9	30.8	50.8	86.5
				2	12.7	80.9	77	3.8	-0.8	20.3	1	19.2	31.9	45.6	91.3
				2	14.6	80.1	72	8.2	0.2	30.2	3.6	26.6	41.2	55.7	92
				2	7.9	86.4	80.3	6.1	5.8	20.8	0.6	20.2	28.1	49	90.1
				2	8.3	80.6	82.2	-1.6	-12.2	23.4	0	23.4	31.7	53.7	89.2
				2	13.8	81.9	76.3	5.7	5.3	21.5	0.6	20.9	34.7	49	96.8
				2	9.7	83.9	79.1	4.7	-1.4	29.3	0.5	28.8	38.5	49.6	89.9
				2	11.1	79.8	76.8	3	-0.6	24.9	9.6	15.3	26.4	53	91.5
				2	6.6	86.8	80.8	5.9	-0.6	12	-1.9	13.8	20.4	51.9	93.3
				2	4.8	84.9	90.4	-5.6	-6.3	15.9	-0.6	16.5	21.3	54.9	89.5
				2	17	75.8	70.7	5.1	4.8	29.7	6.4	23.2	40.2	51.9	85.6
				2	13.5	80.8	75.8	5	4.7	23.7	-1.5	25.2	38.7	46.6	90.7
				2	17.3	72.5	72.8	-0.3	-2.7	20.9	6.9	14	31.3	48.3	83
				2	11.8	82.4	78	4.4	2.9	13.5	-2.2	15.7	27.4	54.6	96.4
				2	7.5	84.1	85	-0.9	-7.9	17.4	1	16.4	23.9	50.2	90.8
				2	9.8	84.1	79	5	-0.2	23.6	6.1	17.5	27.3	52.6	91.5
				2	9.3	77.5	79.7	-2.2	-6.9	20.1	0.2	19.9	29.2	51.7	86.1
				2	14.5	70.7	74.2	-3.5	-14.5	35.6	7	28.5	43	51.4	85.2
				2	9.5	84	85.1	-1.1	-9.1	29.9	4	25.9	35.4	47.3	92.8
				2	13.1	84.2	79.9	4.3	3.2	23	5.6	17.4	30.5	64.1	91.6
				2	14.8	78.9	74	4.9	5.9	19.9	7.3	12.6	27.4	50.6	90.3
				2	9.4	85.8	81.9	3.9	0	21.8	4.8	17	26.4	49.2	91.9
				2	9.8	82.4	73.8	8.7	6.1	32.4	2.5	29.8	39.6	49.5	89.3
				2	13.3	68.9	74.2	-5.3	-13.8	35.4	7	28.4	41.7	50.8	79.6
				2	10.5	82.7	77.6	5.2	5	20.2	0.6	19.6	30.1	57.5	92.4
				2	9.6	84.5	77.8	6.8	3.2	19	0.2	18.8	28.4	53.4	93.1
				2	11.2	83.7	79	4.7	-2.7	25.9	2	23.8	35	50.8	88.9
				2	11.1	84.8	83.5	1.3	-4.3	34	12	22	33.1	58.6	95.1
				2	9.4	83	82	1.1	-6.7	17.7	-2.5	20.2	29.6	54.9	92.9
				2	13.6	80.9	72.2	8.7	3.7	30	10.8	19.2	32.8	52.3	88.9
				2	4.4	87.5	87.8	-0.3	-2.6	14.8	-1	15.8	20.1	57.3	89.4
				2	11.4	78.3	80.6	-2.3	-6.7	20.6	2.3	18.3	29.7	52.2	88.3
				2	7.7	86	79.7	6.3	3.4	23.3	-0.9	24.2	31.9	56.7	91.4
				2	3.9	92.2	81.8	10.4	7.1	21.8	1.8	20	23.8	56.3	96.4
				2	12.8	77.5	84	-6.5	-17	15.2	6.6	8.6	21.4	55.9	89.5
				2	7	76.4	80.6	-4.2	-7.4	31	1.7	29.3	36.2	50.7	83.5
				2	18	72	74.8	-2.8	-9.3	26.3	4.7	21.6	39.6	54.1	88.2
				2	4.8	87.3	81	6.3	1.9	18.6	-1.4	20	24.8	60.2	97.6
				2	8.7	85.4	77.6	7.8	6.2	16.1	-3.5	19.6	28.3	54.8	91.3
				2	8.7	81	75.9	5.1	0.4	30.9	-2	32.9	41.6	51.6	90.7
				2	15.9	80.2	82.1	-1.9	-9.9	26.9	9.8	17.2	33	57.8	91.5
				2	13	76.7	73.6	3.1	3.4	22.3	1	21.3	34.4	52.2	84
				2	7.3	84.2	81.8	2.4	-2.4	20.5	-1.4	21.8	29.2	58.4	97.6
				2	2.5	83.5	84.5	-1	-6.6	11.9	-10.5	22.4	25	50.9	94.4
				2	9.2	82.7	77.5	5.2	-0.2	34.6	2.2	32.4	41.5	44.8	95.3
				2	9.3	79.6	79.6	0	-4.9	27.5	-0.9	28.4	37.7	58.9	91.4
				2	10.2	79.2	78.8	0.4	-5.5	26	1	25	35.2	56.4	90.8
				2	2.7	91.2	87	4.2	-2.4	14.7	-6.8	21.6	24.3	57.5	95.9
				2	6.8	83.8	79.4	4.4	4.9	5.1	-5.5	10.5	17.3	60	94.2
				2	12.9	75.4	70.6	4.8	6.1	17.3	-5	22.3	35.3	60.7	89.6
				2	11.8	79.1	69.2	9.9	1.6	26.2	-1.1	27.3	39.1	47.4	92.4
				2	8.2	81.8	95	-13.2	-19	11	0.8	10.1	18.4	61.4	85.6
				2	6	87.2	80.7	6.5	3.3	20.2	0.2	20	26.1	53.7	88.3
				2	14.4	74.2	71.4	2.8	5.1	19.5	7	12.5	26.9	49	87.8
				2	8.4	82.8	76.3	6.5	3.9	17.6	-1.2	18.8	27.3	56.4	94.6
				2	9.9	79.8	78.7	1.1	1.3	13.5	0.9	12.5	22.4	58.1	88.2
				2	7.9	81.9	81.5	0.3	-6.8	21.7	-3	24.7	32.7	53	92.3
				2	8.4	83.5	79.4	4.1	-1.4	13.2	-1.8	15	23.4	55.8	92.2
				2	0.4	84.5	85.2	-0.7	2.1	10.6	-1.4	11.9	12.3	63.5	92.5
				1	10	75.9	77.7	-1.8	-6.3	14.6	-1	15.7	25.7	51.1	87.5
				1	5.6	84.5	90.9	-6.4	-11.8	16	-1.1	17.1	22.7	55.5	90.4
				1	3.4	86	87.2	-1.2	-4.8	26	-1.3	27.3	30.7	53.5	92.9
				1	6.2	80	84.6	-4.7	-15.2	17.9	-4	21.9	28.1	54.2	90.2
				1	10.8	72.9	70	2.8	3.7	20	-3	22.9	33.7	53.6	84.8
				1	8.1	75.9	73.2	2.7	7.7	19.3	0.9	18.3	26.4	56.4	87.5
				1	6.6	81.5	78.1	3.4	3.1	11.6	-3.5	15.1	21.7	55.6	85.9
				1	2.7	74.4	78.1	-3.8	-1.2	18.3	-6.3	24.5	27.2	52	83.3
				1	9.7	78.9	77.9	0.9	-3.2	11.4	-8.8	20.1	29.8	52.5	87.8
				1	6.6	80.1	80	0	-6.7	11.5	-7	18.5	25.2	51.4	87.8
				1	6.7	83	78.1	5	1	19.9	-0.2	20.1	26.8	55.7	90.3
				1	9	76.8	79.4	-2.6	-6.6	23.3	1.1	22.3	31.3	47.8	87.1
				1	1.8	84.5	87.7	-3.2	-11.3	18.2	-5.8	23.9	25.7	53.7	95.4
				1	6.7	77.5	80.7	-3.2	-0.3	25	-1.1	26.1	32.8	52.4	87.4
				1	1.8	86	82.7	3.3	-1.7	21.7	-3.2	24.9	26.6	52.3	94.9
				1	1.3	85.5	86.3	-0.8	-2.3	12	-7.3	19.3	20.6	55.9	90
				1	9.7	73.6	80.1	-6.6	-18.6	33.2	-3.1	36.3	46.1	58.9	86.7
				1	6.3	80.2	77.2	3	3.4	14.3	-1.5	15.8	22.1	55.7	90.1
				1	4.7	78.4	84.2	-5.9	-6.9	28	1.7	26.3	31	47.6	90.3
				1	4.7	79.4	83.4	-4	-7.6	17.1	-3.9	21	25.7	55.3	84.5
				1	6.7	80.6	82.8	-2.2	-6.9	22.9	2.4	20.4	27.2	58.3	88.8
				1	0.9	82.2	84.4	-2.2	-6.6	15.6	-7.2	22.7	23.7	56.6	89.8
				1	0.9	83	82.3	0.7	-0.4	15.5	-8.1	23.5	24.5	57	90.3
				1	3.8	78.5	85.9	-7.5	-16.5	24.6	-1.6	26.2	29.9	52.8	88.9
				1	5.4	79.8	78.9	0.9	-3.8	22.8	-6.6	29.4	34.8	54.1	91.1
				1	0.2	82.4	88.5	-6.1	-7.9	13	-5.3	18.3	18.6	53.9	88

## Sheet: UAFH LAFH gr NJSN 
Full NJ/SN* 100 ˂0.73			4	Groups	TAFH	UAFH	LAFH	UAFH/TAFH	LAFH/TAFH	UAFH/LAFH
n=24				4	119.8	47.9	71.9	39.9833	60	66.6203
mean =	6.41±5.68			4	121.1	48.7	72.4	40.2147	59.8	67.2652
Normal toward Full 0.73˂NJ/SN x 100 ˂6.41			3	4	106.1	48.3	57.8	45.5231	54.5	83.564
n= 70				4	106.2	46.8	59.4	44.0678	55.9	78.7879
				4	114.2	49.6	64.6	43.4326	56.5	76.7802
Normal toward Flat 6.41˂NJ/SN x 100 ˂12.09			2	4	111.4	47.6	63.8	42.7289	57.3	74.6082
n= 60				4	112.7	46.6	66.1	41.3487	58.7	70.4992
				4	110.8	53.2	57.6	48.0144	52	92.3611
Flat NJ/SN* 100 ˃ 12.09			1	4	126.1	54	72.1	42.8232	57.2	74.896
n= 29				4	103.1	51.4	51.7	49.8545	50.1	99.4197
				4	111.9	48.4	63.5	43.2529	56.7	76.2205
				4	110.1	48.7	61.4	44.2325	55.8	79.316
				4	115	52	63	45.2174	54.8	82.5397
				4	124.3	53.4	70.9	42.9606	57	75.3173
				4	114.5	53	61.5	46.2882	53.7	86.1789
				4	116.6	44.8	71.8	38.422	61.6	62.3955
				4	113.6	54.1	59.5	47.6232	52.4	90.9244
				4	115.9	51.2	64.7	44.176	55.8	79.1345
				4	129.5	54.8	74.7	42.3166	57.7	73.3601
				4	119	55.4	63.6	46.5546	53.4	87.1069
				4	115.3	52.6	62.7	45.6201	54.4	83.8915
				4	108.3	50.7	57.6	46.8144	53.2	88.0208
				4	108.6	49.2	59.4	45.3039	54.7	82.8283
				4	106.2	47.6	58.6	44.8211	55.2	81.2287
				3	115.1	49.5	65.6	43.0061	57	75.4573
				3	119.3	52.8	66.5	44.2582	55.7	79.3985
				3	121.6	48.5	73.1	39.8849	60.1	66.3475
				3	100.3	47.2	53.1	47.0588	52.9	88.8889
				3	108.7	44.7	64	41.1224	58.9	69.8438
				3	118.2	54.8	63.4	46.3621	53.6	86.4353
				3	115.5	51.7	63.8	44.7619	55.2	81.0345
				3	111.3	49	62.3	44.0252	56	78.6517
				3	106.1	45.7	60.4	43.0726	56.9	75.6623
				3	112.5	52.2	60.3	46.4	53.6	86.5672
				3	123.7	54.9	68.8	44.3816	55.6	79.7965
				3	108.9	47.2	61.7	43.3425	56.7	76.4992
				3	118.9	53	65.9	44.5753	55.4	80.4249
				3	128.2	55.8	72.4	43.5257	56.5	77.0718
				3	114.6	50.8	63.8	44.3281	55.7	79.6238
				3	112.9	48.2	64.7	42.6926	57.3	74.4977
				3	130	54.7	75.3	42.0769	57.9	72.6428
				3	117.5	51	66.5	43.4043	56.6	76.6917
				3	121.4	53.8	67.6	44.3163	55.7	79.5858
				3	113.1	53.7	59.4	47.4801	52.6	90.404
				3	112.5	51	61.5	45.3333	54.7	82.9268
				3	114.3	54	60.3	47.2441	52.7	89.5522
				3	119.7	52.5	67.2	43.8596	56.2	78.125
				3	115.2	48.7	66.5	42.2743	57.7	73.2331
				3	111.8	46.7	65.1	41.771	58.2	71.7358
				3	119	54.3	64.7	45.6303	54.3	83.9258
				3	131.3	54.2	77.1	41.2795	58.8	70.2983
				3	118.3	50	68.3	42.2654	57.8	73.2064
				3	116.9	49.8	67.1	42.6005	57.4	74.2176
				3	117	49.3	67.7	42.1368	57.9	72.8213
				3	110.7	48.1	62.6	43.4508	56.5	76.8371
				3	118.7	51.4	67.3	43.3024	56.7	76.3744
				3	132.1	46.9	85.2	35.5034	64.5	55.0469
				3	115.4	51.6	63.8	44.714	55.3	80.8777
				3	112.7	51	61.7	45.2529	54.8	82.658
				3	118.8	55.3	63.5	46.5488	53.5	87.0866
				3	111.3	45.3	66	40.7008	59.3	68.6364
				3	110.6	50.4	60.2	45.5696	54.4	83.7209
				3	109.2	49.2	60	45.0549	54.9	82
				3	113.3	51.7	61.6	45.6311	54.3	83.9286
				3	101.8	50.7	51.1	49.8035	50.2	99.2172
				3	107.2	53.1	54.1	49.5336	50.4	98.1516
				3	110.6	50.6	60	45.7505	54.3	84.3333
				3	121.7	53.8	67.9	44.2071	55.8	79.2342
				3	118.5	56.1	62.4	47.3418	52.7	89.9038
				3	112.8	53.1	59.7	47.0745	52.9	88.9447
				3	123.2	54.6	68.6	44.3182	55.7	79.5918
				3	103.5	54.6	48.9	52.7536	47.2	111.656
				3	108	50.3	57.7	46.5741	53.4	87.175
				3	107.1	47.4	59.7	44.2577	55.7	79.397
				3	116.2	55.5	60.7	47.7625	52.3	91.4333
				3	113	49	64	43.3628	56.7	76.5625
				3	103.5	47.6	55.9	45.9903	54	85.1521
				3	130.5	58.3	72.2	44.6743	55.3	80.7479
				3	128.6	54.2	74.4	42.1462	57.8	72.8495
				3	139.9	57.2	82.7	40.8863	59.1	69.1657
				3	138.1	56	82.1	40.5503	59.4	68.2095
				3	117.3	54.3	63	46.2916	53.7	86.1905
				3	103.9	49.6	54.3	47.7382	52.3	91.3444
				3	114.2	49.6	64.6	43.4326	56.5	76.7802
				3	105	45.4	59.6	43.2381	56.8	76.1745
				3	111.8	41.7	70.1	37.2987	62.7	59.4864
				3	108.6	50.6	58	46.593	53.4	87.2414
				3	119.1	50.8	68.3	42.6532	57.3	74.3777
				3	112	52.9	59.1	47.2321	52.7	89.5093
				3	126	56.1	69.9	44.5238	55.5	80.2575
				3	107.7	51.6	56.1	47.9109	52.1	91.9786
				3	111.3	48.4	62.9	43.4861	56.5	76.9475
				3	123.4	56	67.4	45.3809	54.6	83.0861
				3	125.2	51.1	74.1	40.8147	59.2	68.9609
				2	111.2	47.8	63.4	42.9856	57.1	75.3943
				2	131.7	53	78.7	40.243	59.7	67.3443
				2	98.8	46.8	52	47.3684	52.6	90
				2	115.4	50.3	65.1	43.5875	56.4	77.2657
				2	114.2	50.1	64.1	43.8704	56.1	78.1591
				2	99.2	48.1	51.1	48.4879	51.5	94.1292
				2	123.8	51.9	71.9	41.9225	58.1	72.1836
				2	123.8	53.3	70.5	43.0533	56.9	75.6028
				2	134.3	57.6	76.7	42.8891	57.1	75.0978
				2	122.4	52	70.4	42.4837	57.5	73.8636
				2	104.7	53.1	51.6	50.7163	49.3	102.907
				2	143.9	54	89.9	37.5261	62.5	60.0667
				2	118.7	51.2	67.5	43.134	56.9	75.8519
				2	119.2	49.5	69.7	41.5268	58.5	71.0187
				2	117.4	50.6	66.8	43.1005	56.9	75.7485
				2	110.7	50.1	60.6	45.2575	54.7	82.6733
				2	122.2	61.2	61	50.0818	49.9	100.328
				2	106.5	50.5	56	47.4178	52.6	90.1786
				2	111.6	49.5	62.1	44.3548	55.6	79.7101
				2	113.2	51.9	61.3	45.8481	54.2	84.6656
				2	108	48.9	59.1	45.2778	54.7	82.7411
				2	119.3	52.8	66.5	44.2582	55.7	79.3985
				2	123.4	56.6	66.8	45.8671	54.1	84.7305
				2	112.7	50.2	62.5	44.543	55.5	80.32
				2	113.9	52.8	61.1	46.3565	53.6	86.4157
				2	107.7	48.7	59	45.2182	54.8	82.5424
				2	130.3	52.3	78	40.1381	59.9	67.0513
				2	128.3	52.3	76	40.7638	59.2	68.8158
				2	109.1	48.7	60.4	44.6379	55.4	80.6291
				2	109.9	46	63.9	41.8562	58.1	71.9875
				2	118.1	53.7	64.4	45.4699	54.5	83.3851
				2	114.9	48.6	66.3	42.2977	57.7	73.3032
				2	109.8	51.1	58.7	46.5392	53.5	87.0528
				2	111.9	46	65.9	41.1081	58.9	69.8027
				2	118.6	50.8	67.8	42.8331	57.2	74.9263
				2	107.8	50.4	57.4	46.7532	53.2	87.8049
				2	115.2	52.2	63	45.3125	54.7	82.8571
				2	107.2	51.1	56.1	47.6679	52.4	91.0873
				2	113.5	55.1	58.4	48.5463	51.5	94.3493
				2	116.5	55.9	60.6	47.9828	52	92.2442
				2	109.8	55.5	54.3	50.5464	49.5	102.21
				2	113.9	50.8	63.1	44.6005	55.4	80.5071
				2	118.9	47.5	71.4	39.9495	60.1	66.5266
				2	114.2	54.9	59.3	48.0736	51.9	92.5801
				2	115.7	52.8	62.9	45.6353	54.4	83.9428
				2	108.3	55.2	53.1	50.9695	49	103.955
				2	118.5	50.1	68.4	42.2785	57.8	73.2456
				2	117.8	49.8	68	42.275	57.7	73.2353
				2	132.4	57.9	74.5	43.7311	56.3	77.7181
				2	106.9	47.6	59.3	44.5276	55.5	80.2698
				2	118.4	58.3	60.1	49.2399	50.8	97.005
				2	119.8	56.3	63.5	46.995	53	88.6614
				2	122.7	52.9	69.8	43.1133	56.9	75.788
				2	127.9	54	73.9	42.2205	57.8	73.0717
				2	117.4	51.4	66	43.7819	56.2	77.8788
				2	124.2	51.5	72.7	41.4654	58.5	70.8391
				2	117.2	49.3	67.9	42.0648	57.9	72.6068
				2	111.6	52	59.6	46.595	53.4	87.2483
				2	112.4	54.7	57.7	48.6655	51.4	94.8007
				2	106.7	49.5	57.2	46.3918	53.6	86.5385
				1	118.1	51.1	67	43.2684	56.8	76.2687
				1	137.1	55.6	81.5	40.5543	59.4	68.2209
				1	125.6	53.5	72.1	42.5955	57.4	74.2025
				1	120	56.1	63.9	46.75	53.3	87.7934
				1	111.2	53.2	58	47.8417	52.2	91.7241
				1	113.9	49.8	64.1	43.7226	56.3	77.6911
				1	136.8	56.5	80.3	41.3012	58.7	70.3611
				1	125	51	74	40.8	59.2	68.9189
				1	118.4	52.4	66	44.2568	55.7	79.3939
				1	103.3	49.3	54	47.7251	52.3	91.2963
				1	124.9	56.3	68.6	45.0761	54.9	82.07
				1	98.8	49.3	49.5	49.8988	50.1	99.596
				1	114.5	54.3	60.2	47.4236	52.6	90.1993
				1	113.6	53.6	60	47.1831	52.8	89.3333
				1	135.6	56.6	79	41.7404	58.3	71.6456
				1	113.6	50.7	62.9	44.6303	55.4	80.6041
				1	116.2	53	63.2	45.611	54.4	83.8608
				1	120.5	48	72.5	39.834	60.2	66.2069
				1	126.7	54.2	72.5	42.7782	57.2	74.7586
				1	114.6	51.1	63.5	44.5899	55.4	80.4724
				1	115.2	52.2	63	45.3125	54.7	82.8571
				1	128.7	51.4	77.3	39.9378	60.1	66.4942
				1	119.9	52.2	67.7	43.5363	56.5	77.1049
				1	112.4	52.8	59.6	46.9751	53	88.5906
				1	120.8	59.3	61.5	49.0894	50.9	96.4228
				1	113.2	47.9	65.3	42.3145	57.7	73.3538
				1	117.7	52.5	65.2	44.6049	55.4	80.5215
				1	125.5	55.2	70.3	43.9841	56	78.5206
				1	121.3	53.2	68.1	43.8582	56.1	78.1204

## Sheet: UAFH LAFH gr NGSN 
Full NG/SN* 100 ˂40.23			4	Groups	TAFH	UAFH	LAFH	UAFH/TAFH	LAFH/TAFH	UAFH/LAFH
n=23				4	119.8	47.9	71.9	39.9833	60	66.6203
mean =	44.41±4.18			4	106.2	46.8	59.4	44.0678	55.9	78.7879
Normal toward Full 40.23 ˂NG/SN x 100 ˂44.41			3	4	106.1	48.3	57.8	45.5231	54.5	83.564
n= 74				4	111.4	47.6	63.8	42.7289	57.3	74.6082
				4	121.1	48.7	72.4	40.2147	59.8	67.2652
Normal toward Flat 44.41˂SNG/SN x 100 ˂48.59			2	4	119	55.4	63.6	46.5546	53.4	87.1069
n= 60				4	114.2	49.6	64.6	43.4326	56.5	76.7802
				4	100.3	47.2	53.1	47.0588	52.9	88.8889
Flat NG/SN* 100 ˃48.59			1	4	129.5	54.8	74.7	42.3166	57.7	73.3601
n=26				4	124.3	53.4	70.9	42.9606	57	75.3173
				4	103.1	51.4	51.7	49.8545	50.1	99.4197
				4	110.8	53.2	57.6	48.0144	52	92.3611
				4	111.3	49	62.3	44.0252	56	78.6517
				4	114.3	54	60.3	47.2441	52.7	89.5522
				4	112.7	46.6	66.1	41.3487	58.7	70.4992
				4	108.6	49.2	59.4	45.3039	54.7	82.8283
				4	126.1	54	72.1	42.8232	57.2	74.896
				4	114.5	53	61.5	46.2882	53.7	86.1789
				4	106.2	47.6	58.6	44.8211	55.2	81.2287
				4	111.9	48.4	63.5	43.2529	56.7	76.2205
				4	115.2	48.7	66.5	42.2743	57.7	73.2331
				4	115	52	63	45.2174	54.8	82.5397
				4	116.6	44.8	71.8	38.422	61.6	62.3955
				3	131.7	53	78.7	40.243	59.7	67.3443
				3	121.6	48.5	73.1	39.8849	60.1	66.3475
				3	115.9	51.2	64.7	44.176	55.8	79.1345
				3	118.3	50	68.3	42.2654	57.8	73.2064
				3	117	49.3	67.7	42.1368	57.9	72.8213
				3	121.4	53.8	67.6	44.3163	55.7	79.5858
				3	134.3	57.6	76.7	42.8891	57.1	75.0978
				3	130	54.7	75.3	42.0769	57.9	72.6428
				3	118.2	54.8	63.4	46.3621	53.6	86.4353
				3	110.6	50.4	60.2	45.5696	54.4	83.7209
				3	130.3	52.3	78	40.1381	59.9	67.0513
				3	108	48.9	59.1	45.2778	54.7	82.7411
				3	117.5	51	66.5	43.4043	56.6	76.6917
				3	108.9	47.2	61.7	43.3425	56.7	76.4992
				3	104.7	53.1	51.6	50.7163	49.3	102.907
				3	128.2	55.8	72.4	43.5257	56.5	77.0718
				3	114.6	50.8	63.8	44.3281	55.7	79.6238
				3	106.1	45.7	60.4	43.0726	56.9	75.6623
				3	110.1	48.7	61.4	44.2325	55.8	79.316
				3	107.8	50.4	57.4	46.7532	53.2	87.8049
				3	112.5	51	61.5	45.3333	54.7	82.9268
				3	112.9	48.2	64.7	42.6926	57.3	74.4977
				3	113.3	51.7	61.6	45.6311	54.3	83.9286
				3	108.7	44.7	64	41.1224	58.9	69.8438
				3	119	54.3	64.7	45.6303	54.3	83.9258
				3	115.1	49.5	65.6	43.0061	57	75.4573
				3	110.6	50.6	60	45.7505	54.3	84.3333
				3	111.8	41.7	70.1	37.2987	62.7	59.4864
				3	143.9	54	89.9	37.5261	62.5	60.0667
				3	139.9	57.2	82.7	40.8863	59.1	69.1657
				3	109.1	48.7	60.4	44.6379	55.4	80.6291
				3	117.2	49.3	67.9	42.0648	57.9	72.6068
				3	116.9	49.8	67.1	42.6005	57.4	74.2176
				3	113.6	54.1	59.5	47.6232	52.4	90.9244
				3	112.7	51	61.7	45.2529	54.8	82.658
				3	112.8	53.1	59.7	47.0745	52.9	88.9447
				3	118.9	53	65.9	44.5753	55.4	80.4249
				3	131.3	54.2	77.1	41.2795	58.8	70.2983
				3	103.9	49.6	54.3	47.7382	52.3	91.3444
				3	115.5	51.7	63.8	44.7619	55.2	81.0345
				3	123.4	56.6	66.8	45.8671	54.1	84.7305
				3	113.1	53.7	59.4	47.4801	52.6	90.404
				3	119.3	52.8	66.5	44.2582	55.7	79.3985
				3	99.2	48.1	51.1	48.4879	51.5	94.1292
				3	110.7	48.1	62.6	43.4508	56.5	76.8371
				3	106.5	50.5	56	47.4178	52.6	90.1786
				3	118.7	51.4	67.3	43.3024	56.7	76.3744
				3	122.4	52	70.4	42.4837	57.5	73.8636
				3	122.2	61.2	61	50.0818	49.9	100.328
				3	115.4	50.3	65.1	43.5875	56.4	77.2657
				3	115.3	52.6	62.7	45.6201	54.4	83.8915
				3	122.7	52.9	69.8	43.1133	56.9	75.788
				3	109.2	49.2	60	45.0549	54.9	82
				3	123.7	54.9	68.8	44.3816	55.6	79.7965
				3	121.7	53.8	67.9	44.2071	55.8	79.2342
				3	108.3	50.7	57.6	46.8144	53.2	88.0208
				3	118.8	55.3	63.5	46.5488	53.5	87.0866
				3	110.7	50.1	60.6	45.2575	54.7	82.6733
				3	111.3	45.3	66	40.7008	59.3	68.6364
				3	128.6	54.2	74.4	42.1462	57.8	72.8495
				3	130.5	58.3	72.2	44.6743	55.3	80.7479
				3	111.2	47.8	63.4	42.9856	57.1	75.3943
				3	112.5	52.2	60.3	46.4	53.6	86.5672
				3	108.6	50.6	58	46.593	53.4	87.2414
				3	128.3	52.3	76	40.7638	59.2	68.8158
				3	115.2	52.2	63	45.3125	54.7	82.8571
				3	98.8	46.8	52	47.3684	52.6	90
				3	113	49	64	43.3628	56.7	76.5625
				3	119.7	52.5	67.2	43.8596	56.2	78.125
				3	119.1	50.8	68.3	42.6532	57.3	74.3777
				3	111.8	46.7	65.1	41.771	58.2	71.7358
				3	115.4	51.6	63.8	44.714	55.3	80.8777
				3	109.9	46	63.9	41.8562	58.1	71.9875
				3	138.1	56	82.1	40.5503	59.4	68.2095
				2	114.2	50.1	64.1	43.8704	56.1	78.1591
				2	114.2	54.9	59.3	48.0736	51.9	92.5801
				2	112.7	50.2	62.5	44.543	55.5	80.32
				2	113.2	51.9	61.3	45.8481	54.2	84.6656
				2	117.3	54.3	63	46.2916	53.7	86.1905
				2	127.9	54	73.9	42.2205	57.8	73.0717
				2	103.5	47.6	55.9	45.9903	54	85.1521
				2	123.8	53.3	70.5	43.0533	56.9	75.6028
				2	118.9	47.5	71.4	39.9495	60.1	66.5266
				2	101.8	50.7	51.1	49.8035	50.2	99.2172
				2	119.2	49.5	69.7	41.5268	58.5	71.0187
				2	116.2	55.5	60.7	47.7625	52.3	91.4333
				2	107.7	51.6	56.1	47.9109	52.1	91.9786
				2	113.9	50.8	63.1	44.6005	55.4	80.5071
				2	103.5	54.6	48.9	52.7536	47.2	111.656
				2	107.7	48.7	59	45.2182	54.8	82.5424
				2	117.4	50.6	66.8	43.1005	56.9	75.7485
				2	118.1	51.1	67	43.2684	56.8	76.2687
				2	124.2	51.5	72.7	41.4654	58.5	70.8391
				2	123.2	54.6	68.6	44.3182	55.7	79.5918
				2	126	56.1	69.9	44.5238	55.5	80.2575
				2	117.8	49.8	68	42.275	57.7	73.2353
				2	105	45.4	59.6	43.2381	56.8	76.1745
				2	111.6	49.5	62.1	44.3548	55.6	79.7101
				2	128.7	51.4	77.3	39.9378	60.1	66.4942
				2	118.5	56.1	62.4	47.3418	52.7	89.9038
				2	112	52.9	59.1	47.2321	52.7	89.5093
				2	107.1	47.4	59.7	44.2577	55.7	79.397
				2	132.1	46.9	85.2	35.5034	64.5	55.0469
				2	113.9	52.8	61.1	46.3565	53.6	86.4157
				2	111.9	46	65.9	41.1081	58.9	69.8027
				2	123.8	51.9	71.9	41.9225	58.1	72.1836
				2	118.1	53.7	64.4	45.4699	54.5	83.3851
				2	119.3	52.8	66.5	44.2582	55.7	79.3985
				2	111.3	48.4	62.9	43.4861	56.5	76.9475
				2	118.7	51.2	67.5	43.134	56.9	75.8519
				2	120.5	48	72.5	39.834	60.2	66.2069
				2	118.6	50.8	67.8	42.8331	57.2	74.9263
				2	109.8	51.1	58.7	46.5392	53.5	87.0528
				2	108	50.3	57.7	46.5741	53.4	87.175
				2	118.5	50.1	68.4	42.2785	57.8	73.2456
				2	125.2	51.1	74.1	40.8147	59.2	68.9609
				2	113.5	55.1	58.4	48.5463	51.5	94.3493
				2	123.4	56	67.4	45.3809	54.6	83.0861
				2	113.6	53.6	60	47.1831	52.8	89.3333
				2	114.9	48.6	66.3	42.2977	57.7	73.3032
				2	137.1	55.6	81.5	40.5543	59.4	68.2209
				2	132.4	57.9	74.5	43.7311	56.3	77.7181
				2	107.2	53.1	54.1	49.5336	50.4	98.1516
				2	108.3	55.2	53.1	50.9695	49	103.955
				2	118.4	58.3	60.1	49.2399	50.8	97.005
				2	106.9	47.6	59.3	44.5276	55.5	80.2698
				2	120	56.1	63.9	46.75	53.3	87.7934
				2	114.2	49.6	64.6	43.4326	56.5	76.7802
				2	119.8	56.3	63.5	46.995	53	88.6614
				2	116.5	55.9	60.6	47.9828	52	92.2442
				2	112.4	54.7	57.7	48.6655	51.4	94.8007
				2	136.8	56.5	80.3	41.3012	58.7	70.3611
				2	107.2	51.1	56.1	47.6679	52.4	91.0873
				2	113.9	49.8	64.1	43.7226	56.3	77.6911
				1	98.8	49.3	49.5	49.8988	50.1	99.596
				1	115.7	52.8	62.9	45.6353	54.4	83.9428
				1	125.6	53.5	72.1	42.5955	57.4	74.2025
				1	118.4	52.4	66	44.2568	55.7	79.3939
				1	111.6	52	59.6	46.595	53.4	87.2483
				1	114.5	54.3	60.2	47.4236	52.6	90.1993
				1	124.9	56.3	68.6	45.0761	54.9	82.07
				1	121.3	53.2	68.1	43.8582	56.1	78.1204
				1	109.8	55.5	54.3	50.5464	49.5	102.21
				1	103.3	49.3	54	47.7251	52.3	91.2963
				1	117.4	51.4	66	43.7819	56.2	77.8788
				1	113.6	50.7	62.9	44.6303	55.4	80.6041
				1	114.6	51.1	63.5	44.5899	55.4	80.4724
				1	126.7	54.2	72.5	42.7782	57.2	74.7586
				1	106.7	49.5	57.2	46.3918	53.6	86.5385
				1	111.2	53.2	58	47.8417	52.2	91.7241
				1	135.6	56.6	79	41.7404	58.3	71.6456
				1	116.2	53	63.2	45.611	54.4	83.8608
				1	113.2	47.9	65.3	42.3145	57.7	73.3538
				1	119.9	52.2	67.7	43.5363	56.5	77.1049
				1	125	51	74	40.8	59.2	68.9189
				1	115.2	52.2	63	45.3125	54.7	82.8571
				1	120.8	59.3	61.5	49.0894	50.9	96.4228
				1	117.7	52.5	65.2	44.6049	55.4	80.5215
				1	112.4	52.8	59.6	46.9751	53	88.5906
				1	125.5	55.2	70.3	43.9841	56	78.5206
